# Supplementary material
Source: PubMed Central journal article supplement (PMC1994595)
Supplement: JCI0729959sd.pdf [file JCI0729959sd.pdf]

**Supplemental Table 1.** Candidate fetal genes in whole blood

| Gene                                               | Probe set ID | Gene Symbol | Accession Number | Biological function                                                                                                                                                                                                                                | p value <sup>A</sup> | p value <sup>B</sup> | Count <sup>C</sup> |
|----------------------------------------------------|--------------|-------------|------------------|----------------------------------------------------------------------------------------------------------------------------------------------------------------------------------------------------------------------------------------------------|----------------------|----------------------|--------------------|
| S-phase kinase-associated protein 1A (p19A)        | 200719_at    | SKP1A       | NM_006930        | Ubiquitin cycle, may be involved in transcription regulation for development or maintenance of specialized functions of the inner ear                                                                                                              | 0.0186               | 0.0000               | 9 of 10            |
| Family with sequence similarity 120A               | 200767_s_at  | FAM120A     | NM_014612        | ATP biosynthesis, transport, ion transport, ATP synthesis coupled proton transport, proton transport, generation of precursor metabolites and energy                                                                                               | 0.0411               | 0.0425               | 8 of 10            |
| CTD small phosphatase-like                         | 201906_s_at  | CTDSPL      | NM_005808        | Biological function unknown                                                                                                                                                                                                                        | 0.0114               | 0.0358               | 8 of 10            |
| Upstream transcription factor 2, c-fos interacting | 202152_x_at  | USF2        | NM_003367        | Regulation of transcription, DNA-dependent regulation of transcription, transcription                                                                                                                                                              | 0.0143               | 0.0000               | 9 of 10            |
| Tumor-associated calcium signal transducer 2       | 202286_s_at  | TACSTD2     | J04152           | Cell surface receptor linked signal transduction, visual perception, cell proliferation, response to stimulus, regulation of progression through cell cycle                                                                                        | 0.0216               | 0.0002               | 8 of 10            |
| Dehydrogenase/reductase member 3                   | 202481_at    | DHRS3       | NM_004753        | Visual perception, metabolism, retinol metabolism                                                                                                                                                                                                  | 0.0000               | 0.0001               | 9 of 10            |
| Adenylate kinase 1                                 | 202588_at    | AK1         | NM_000476        | Nucleobase, nucleoside, nucleotide and nucleic acid metabolism, ATP metabolism                                                                                                                                                                     | 0.0274               | 0.0000               | 7 of 10            |
| Cyclin B2                                          | 202705_at    | CCNB2       | NM_004701        | Regulation of progression through cell cycle, cell cycle mitosis, cell division, protein biosynthesis, translational initiation, regulation of translational initiation, distinct pattern of expression during spermatogenesis                     | 0.0000               | 0.0016               | 8 of 10            |
| Integral membrane protein 2A                       | 202747_s_at  | ITM2A       | NM_004867        | Seen to be expressed in outer perichondrial rim of postnatal mandibular condyle                                                                                                                                                                    | 0.0495               | 0.0118               | 7 of 10            |
| Neuroblastoma-amplified protein                    | 202926_at    | NAG         | NM_015909        | Upregulated in neuroblastoma                                                                                                                                                                                                                       | 0.0023               | 0.0003               | 10 of 10           |
| Mevalonate (diphospho) decarboxylase               | 203027_s_at  | MVD         | NM_002461        | Cholesterol, lipid, sterol and isoprenoid biosynthesis, phosphorylation                                                                                                                                                                            | 0.0000               | 0.0000               | 10 of 10           |
| Myotubularin related protein 2                     | 203212_s_at  | MTMR2       | NM_016156        | Protein amino acid and phospholipid dephosphorylation                                                                                                                                                                                              | 0.0036               | 0.0466               | 7 of 10            |
| Frizzled homolog 6 (Drosophila)                    | 203987_at    | FZD6        | NM_003506        | Establishment of tissue polarity, cell surface receptor linked signal transduction, G-protein coupled receptor protein signaling pathway, frizzled signaling pathway, development, signal transduction development, Wnt receptor signaling pathway | 0.0489               | 0.0012               | 7 of 10            |
| Arylsulfatase A                                    | 204443_at    | ARSA        | NM_000487        | Lipid and sphingolipid metabolism, metabolism                                                                                                                                                                                                      | 0.0000               | 0.0000               | 10 of 10           |
| Nuclear pore complex interacting protein           | 204538_x_at  | NPIP        | NM_006985        | Neuropeptide signaling pathway                                                                                                                                                                                                                     | 0.0011               | 0.0295               | 8 of 10            |

|                                                                            |             |         |           |                                                                                                                                                                                                                                                                                                                                       |        |        |          |
|----------------------------------------------------------------------------|-------------|---------|-----------|---------------------------------------------------------------------------------------------------------------------------------------------------------------------------------------------------------------------------------------------------------------------------------------------------------------------------------------|--------|--------|----------|
| Natriuretic peptide receptor A/guanlyate cyclase A                         | 204648_at   | NPR1    | NM_000906 | cGMP biosynthesis, protein amino acid phosphorylation, cell surface receptor linked signal transduction, intracellular signaling cascade, fluid secretion, blood pressure regulation, negative regulation of cell growth, vascular permeability and angiogenesis, diuresis, natriuresis, vasodilation, cyclic nucleotide biosynthesis | 0.0095 | 0.0005 | 8 of 10  |
| Protoporphyrinogen oxidase                                                 | 204788_s_at | PPOX    | NM_000309 | Electron transport, heme and porphyrin biosynthesis                                                                                                                                                                                                                                                                                   | 0.0062 | 0.0028 | 7 of 10  |
| Zinc finger protein 646                                                    | 204876_at   | ZNF646  | NM_014699 | Transcription regulation of transcription, DNA dependent                                                                                                                                                                                                                                                                              | 0.0479 | 0.0237 | 8 of 10  |
| Neuralized-like (Drosophila)                                               | 204888_s_at | NEURL   | NM_004210 | Nervous system development, involved in determination of cell fate in neurogenic region of embryo                                                                                                                                                                                                                                     | 0.0000 | 0.0080 | 9 of 10  |
| AP2 associated kinase 1                                                    | 205435_s_at | AAK1    | NM_014911 | Protein amino acid phosphorylation                                                                                                                                                                                                                                                                                                    | 0.0324 | 0.0365 | 7 of 10  |
| Kallikrein-related peptidase 11                                            | 205470_s_at | KLK11   | NM_006853 | Proteolysis                                                                                                                                                                                                                                                                                                                           | 0.0000 | 0.0000 | 10 of 10 |
| Bactericidal/permeability-increasing protein                               | 205557_at   | BPI     | NM_001725 | Immune response, response to pest, pathogen or parasite, defense response to bacteria                                                                                                                                                                                                                                                 | 0.0094 | 0.0103 | 8 of 10  |
| Gamma-glutamyltransferase-like activity 1                                  | 205582_s_at | GGTLA1  | NM_004121 | Amino acid metabolism, glutathione and leukotriene biosynthesis                                                                                                                                                                                                                                                                       | 0.0004 | 0.0013 | 8 of 10  |
| Cathepsin G                                                                | 205653_at   | CTSG    | NM_001911 | Proteolysis, immune response, killing and engulfing of pathogens                                                                                                                                                                                                                                                                      | 0.0041 | 0.0000 | 9 of 10  |
| Gamma-aminobutyric acid (GABA) A receptor, beta 3                          | 205850_s_at | GABRB3  | NM_000814 | Ion transport, signal transduction, transport                                                                                                                                                                                                                                                                                         | 0.0414 | 0.0028 | 9 of 10  |
| RNA binding motif protein 19                                               | 206019_at   | RBM19   | NM_014852 | RNA, nucleic acid, and nucleotide binding                                                                                                                                                                                                                                                                                             | 0.0026 | 0.0094 | 8 of 10  |
| Interleukin 3 receptor, alpha (low affinity)                               | 206148_at   | IL3RA   | NM_002183 | Protein amino acid phosphorylation, development                                                                                                                                                                                                                                                                                       | 0.0298 | 0.0176 | 8 of 10  |
| Exostoses (multiple)-like 1                                                | 206329_at   | EXTL1   | NM_004455 | Skeletal development                                                                                                                                                                                                                                                                                                                  | 0.0260 | 0.0000 | 9 of 10  |
| ELAV (embryonic lethal, abnormal vision, Drosophila)-like 3 (Hu antigen C) | 206338_at   | ELAVL3  | NM_001420 | Nervous system development, cell differentiation, development                                                                                                                                                                                                                                                                         | 0.0233 | 0.0023 | 7 of 10  |
| Solute carrier organic anion transporter family, member 1B3 <sup>D</sup>   | 206354_at   | SLCO1B3 | NM_019844 | Transport, ion, decarboxylic acid and organic acid transport                                                                                                                                                                                                                                                                          | 0.0234 | 0.0043 | 7 of 10  |
| Chemokine (C motif) ligand 2 <sup>D</sup>                                  | 206366_x_at | XCL2    | U23772    | Chemotaxis, immune response, signal transduction, cell-cell signaling, circulation, calcium ion homeostasis, chemotaxis, cell-cell signaling antimicrobial humoral response (sensu Vertebrata)                                                                                                                                        | 0.0141 | 0.0364 | 8 of 10  |
| CD19 molecule                                                              | 206398_s_at | CD19    | NM_001770 | Cellular defense response, cell surface receptor linked signal transduction                                                                                                                                                                                                                                                           | 0.0069 | 0.0006 | 10 of 10 |
| Neural retina leucine zipper                                               | 206597_at   | NRL     | NM_006177 | Transcription, regulation of transcription, DNA-dependent transcription from RNA polymerase II promoter regulation of rhodopsin gene activity, visual perception, response to stimulus, photoreceptor development and function, preferentially expressed in rod photoreceptors                                                        | 0.0048 | 0.0000 | 7 of 10  |
| IQ motif containing C <sup>E</sup>                                         | 206650_at   | IQCC    | NM_018134 | Biological function unknown                                                                                                                                                                                                                                                                                                           | 0.0370 | 0.0002 | 8 of 10  |

|                                                                               |             |          |           |                                                                                                                                                                                                                                                                                                                                                         |        |        |          |
|-------------------------------------------------------------------------------|-------------|----------|-----------|---------------------------------------------------------------------------------------------------------------------------------------------------------------------------------------------------------------------------------------------------------------------------------------------------------------------------------------------------------|--------|--------|----------|
| Elastase 2, neutrophil <sup>D</sup>                                           | 206871_at   | ELA2     | NM_001972 | Proteolysis, calcium ion homeostasis, response to UV, protein catabolism, anti-inflammatory response, positive regulation of MAPD activity, negative regulation of chemokine biosynthesis, interleukin-8, inflammatory response, and chemotaxis, biosynthesis, positive regulation of interleukin 8, and smooth muscle cell proliferation               | 0.0045 | 0.0268 | 10 of 10 |
| Complement factor H-related 2                                                 | 206910_x_at | CFHR2    | NM_005666 | Immune Response                                                                                                                                                                                                                                                                                                                                         | 0.0174 | 0.0160 | 9 of 10  |
| Histone 1, H4e <sup>D</sup>                                                   | 206951_at   | HIST1H4E | NM_003545 | Nucleosome assembly, chromosome organization and biogenesis (sensu Eukaryota), establishment and/or maintenance of chromatin architecture, phosphoinositide-mediated signaling                                                                                                                                                                          | 0.0008 | 0.0370 | 8 of 10  |
| Defensin, alpha 4, corticostatin <sup>D</sup>                                 | 207269_at   | DEFA4    | NM_001925 | Xenobiotic metabolism, response to pest, pathogen or parasite, defense response to bacteria and fungi, defense response                                                                                                                                                                                                                                 | 0.0444 | 0.0019 | 9 of 10  |
| Aspartate beta-hydroxylase                                                    | 207284_s_at | ASPH     | NM_020164 | Muscle contraction, peptidyl-amino acid modification                                                                                                                                                                                                                                                                                                    | 0.0346 | 0.0345 | 6 of 10  |
| GIPC PDZ domain containing family member 1                                    | 207525_s_at | GIPC1    | NM_005716 | G-protein coupled receptor protein signaling pathway, nuclear mRNA splicing, via spliceosome mRNA processing and metabolism, RNA splicing, spliceosome assembly                                                                                                                                                                                         | 0.0083 | 0.0000 | 9 of 10  |
| Arginine vasopressin                                                          | 207848_at   | AVP      | NM_000490 | Generation of precursor metabolites and energy, water transport, signal transduction, cell-cell signaling, vasoconstriction, regulation of blood vessel size, direct antidiuretic action on kidney, contraction of smooth muscle during parturition and lactation. Involved in cognition tolerance adaptation and complex sexual and maternal behavior. | 0.0000 | 0.0169 | 8 of 10  |
| Rho guanine exchange facotr (GEF) 16                                          | 208009_s_at | ARHGEF16 | NM_014448 | Regulation of Rho protein signal transduction                                                                                                                                                                                                                                                                                                           | 0.0046 | 0.0217 | 5 of 10  |
| Neuregulin 1                                                                  | 208232_x_at | NRG1     | L12260    | Nervous system development, embryonic development, negative regulation of transcription, cell differentiation                                                                                                                                                                                                                                           | 0.0277 | 0.0002 | 7 of 10  |
| Protein phosphatase, EF-hand calcium binding domain 2                         | 208411_x_at | PPEF2    | NM_006239 | Protein amino acid dephosphorylation, visual perception, response to stimulus, detection of stimulus during sensory perception                                                                                                                                                                                                                          | 0.0410 | 0.0016 | 9 of 10  |
| RAS p21 protein activator 4                                                   | 208534_s_at | RASA4    | NM_006989 | Intracellular signaling cascade, regulation of small GTPase mediated signal transduction                                                                                                                                                                                                                                                                | 0.0001 | 0.0081 | 7 of 10  |
| Acidic (leucine-rich) nuclear phosphoprotein 32 family, member C <sup>D</sup> | 208538_at   | ANP32C   | NM_012403 | Tumor suppressor activity                                                                                                                                                                                                                                                                                                                               | 0.0345 | 0.0037 | 7 of 10  |
| Interferon-related developmental regulator 2                                  | 209100_at   | IFRD2    | BC001327  | Cell proliferation and differentiation                                                                                                                                                                                                                                                                                                                  | 0.0032 | 0.0499 | 9 of 10  |

|                                                                                        |             |        |           |                                                                                                                                                                                                                                                                                                                                                                                                   |        |        |          |
|----------------------------------------------------------------------------------------|-------------|--------|-----------|---------------------------------------------------------------------------------------------------------------------------------------------------------------------------------------------------------------------------------------------------------------------------------------------------------------------------------------------------------------------------------------------------|--------|--------|----------|
| Aurora kinase B                                                                        | 209464_at   | AURKB  | AB011446  | Protein amino acid phosphorylation, cell cycle mitosis, cell division                                                                                                                                                                                                                                                                                                                             | 0.0011 | 0.0000 | 9 of 10  |
| Adenosine monophosphate deaminase (isoform E)                                          | 209491_s_at | AMPD3  | NM_000480 | AMP catabolism, nucleotide metabolism, purine ribonucleoside monophosphate biosynthesis                                                                                                                                                                                                                                                                                                           | 0.0001 | 0.0014 | 9 of 10  |
| Paraneoplastic antigen MA2                                                             | 209598_at   | PNMA2  | AB020690  | Biological function unknown                                                                                                                                                                                                                                                                                                                                                                       | 0.0026 | 0.0275 | 6 of 10  |
| S100 calcium binding protein, beta (neural) <sup>D</sup>                               | 209686_at   | S100B  | BC001766  | Energy reserve metabolism, calcium ion homeostasis, induction of apoptosis, axonogenesis, central nervous system development, learning and/or memory cell proliferation, regulation of cytokine biosynthesis, positive regulation of complement activation, astrocyte activation, hyperphosphorylation, regulation of long-term neuronal synaptic plasticity, regulation of protein, biosynthesis | 0.0082 | 0.0006 | 8 of 10  |
| Sema domain, immunoglobulin domain (Ig), short basic domain, secreted, (semaphorin) 3F | 209730_at   | SEMA3F | U38276    | Development                                                                                                                                                                                                                                                                                                                                                                                       | 0.0256 | 0.0004 | 9 of 10  |
| Mannosyl (beta-1, 4)-glycoprotein beta-1, 4-N-acetylglucosaminyl transferase           | 209764_at   | MGAT3  | NM_002409 | Protein amino acid glycosylation, protein amino acid N-linked glycosylation                                                                                                                                                                                                                                                                                                                       | 0.0164 | 0.0004 | 10 of 10 |
| Leucine rich repeat, neuronal 3                                                        | 209840_s_at | LRRN3  | NM_018334 | Biological function unknown                                                                                                                                                                                                                                                                                                                                                                       | 0.0000 | 0.0000 | 10 of 10 |
| Amyloid beta (A4) precursor protein-binding, family A, member 2 (X11-like)             | 209871_s_at | APBA2  | NM_005503 | Nervous system development, protein transport, transport                                                                                                                                                                                                                                                                                                                                          | 0.0086 | 0.0069 | 8 of 10  |
| Synuclein, gamma (breast cancer-specific protein 1)                                    | 209877_at   | SNCG   | AF010126  | Protein metabolism, believed to be involved in pathogenesis of neurodegenerative diseases, high levels seen in advanced breast carcinoma                                                                                                                                                                                                                                                          | 0.0159 | 0.0000 | 9 of 10  |
| Musculin (activated B-Cell factor-1)                                                   | 209928_s_at | MSC    | AF060154  | Regulation of transcription, DNA-dependent transcription from RNA polymerase II promoter, transcription. Protein members of this family are required for a number of different developmental pathways, specifically myogenesis                                                                                                                                                                    | 0.0161 | 0.0020 | 9 of 10  |
| Cytochrome P450, family 2, subfamily E, polypeptide 1                                  | 209976_s_at | CYP2E1 | AF182276  | Electron transport                                                                                                                                                                                                                                                                                                                                                                                | 0.0014 | 0.0002 | 9 of 10  |
| Inositol 1,3,4-triphosphate 5/6 kinase                                                 | 210197_at   | ITPK1  | BC003622  | Signal transduction                                                                                                                                                                                                                                                                                                                                                                               | 0.0005 | 0.0000 | 9 of 10  |
| Cathelicidin antimicrobial peptide                                                     | 210244_at   | CAMP   | U19970    | Response to pest, pathogen or parasite, defense response to bacteria                                                                                                                                                                                                                                                                                                                              | 0.0141 | 0.0000 | 8 of 10  |
| Acetylcholinesterase (Yt blood group)                                                  | 210332_at   | ACHE   | M55040    | Acetylcholine catabolism in synaptic cleft, DNA replication, cell adhesion, synaptogenesis, muscle development, cell proliferation, response to wounding, neurotransmitter catabolism, amyloid precursor, protein metabolism, positive regulation of protein secretion, nervous system development                                                                                                | 0.0365 | 0.0015 | 8 of 10  |
| Glutamate dehydrogenase 2 <sup>F</sup>                                                 | 210447_at   | GLUD2  | BC005111  | Electron transport, amino acid and glutamate metabolism                                                                                                                                                                                                                                                                                                                                           | 0.0350 | 0.0009 | 9 of 10  |
| Pyruvate kinase, liver and RBC <sup>O</sup>                                            | 210451_at   | PKLR   | M15465    | Glycolysis                                                                                                                                                                                                                                                                                                                                                                                        | 0.0076 | 0.0344 | 8 of 10  |

|                                                                                 |             |         |           |                                                                                                                                                                                                                                                                                                                                                                                                                                                                                                                                                                                                                                |        |        |          |
|---------------------------------------------------------------------------------|-------------|---------|-----------|--------------------------------------------------------------------------------------------------------------------------------------------------------------------------------------------------------------------------------------------------------------------------------------------------------------------------------------------------------------------------------------------------------------------------------------------------------------------------------------------------------------------------------------------------------------------------------------------------------------------------------|--------|--------|----------|
| High mobility group AT-hook 1                                                   | 210457_x_at | HMGA1   | AF176039  | DNA unwinding during replication, nucleosome disassembly, loss of chromatin, silencing, transcription regulation of transcription, DNA-dependent regulation of transcription, DNA-dependent protein complex assembly chromosome organization and biogenesis (sensu Eukaryota), transmembrane receptor protein tyrosine kinase signaling pathway, positive regulation of transcription                                                                                                                                                                                                                                          | 0.0298 | 0.0000 | 9 of 10  |
| Nuclear distribution gene C homolog (A. nidulans)                               | 210575_at   | NUDC    | AF241788  | Cell cycle mitosis, cell division                                                                                                                                                                                                                                                                                                                                                                                                                                                                                                                                                                                              | 0.0285 | 0.0000 | 9 of 10  |
| Peroxisome proliferative activated receptor, delta                              | 210636_at   | PPARD   | BC002715  | Negative regulation of transcription from RNA polymerase II promoter, glucose metabolism, generation of precursor metabolites and energy, transcription, lipid metabolism, fatty acid beta oxidation, apoptosis, embryo implantation, cholesterol metabolism, cell proliferation, nerve ensheathment, epidermis development, fatty acid catabolism, glucose and fatty acid transport, positive regulation of fat cell differentiation, decidualization, regulation of insulin secretion, cellular physiological process regulation of transcription, DNA-dependent regulation of transcription from RNA polymerase II promoter | 0.0461 | 0.0239 | 8 of 10  |
| Regucalcin (senescence marker protein-30)                                       | 210751_s_at | RGN     | D31815    | Calcium ion binding, enzyme regulator activity                                                                                                                                                                                                                                                                                                                                                                                                                                                                                                                                                                                 | 0.0059 | 0.0232 | 8 of 10  |
| Cysteine and glycine-rich protein 2                                             | 211126_s_at | CSRP2   | U46006    | Muscle development, cell proliferation, organ morphogenesis, cell growth and differentiation, development                                                                                                                                                                                                                                                                                                                                                                                                                                                                                                                      | 0.0076 | 0.0000 | 7 of 10  |
| Killer cell immunoglobulin-like receptor, two domains, long cytoplasmic tail, 4 | 211242_x_at | KIR2DL4 | AF276292  | Cellular defense response, signal transduction                                                                                                                                                                                                                                                                                                                                                                                                                                                                                                                                                                                 | 0.0010 | 0.0028 | 8 of 10  |
| Interferon, alpha 2                                                             | 211338_at   | IFNA2   | NM_000605 | Induction of apoptosis, defense response, inflammatory response, cell surface receptor linked signal transduction, cell-cell signaling, response to virus                                                                                                                                                                                                                                                                                                                                                                                                                                                                      | 0.0241 | 0.0011 | 7 of 10  |
| Leucine rich repeat containing 21                                               | 211353_at   | LRRC21  | AB031547  | Biological function unknown                                                                                                                                                                                                                                                                                                                                                                                                                                                                                                                                                                                                    | 0.0076 | 0.0023 | 7 of 10  |
|                                                                                 | 211459_at   |         | AF234262  | Biological function unknown                                                                                                                                                                                                                                                                                                                                                                                                                                                                                                                                                                                                    | 0.0000 | 0.0016 | 10 of 10 |
| Receptor-associated protein of the synapse, 43kD <sup>D</sup>                   | 211570_s_at | RAPSN   | BC004196  | Synaptic transmission                                                                                                                                                                                                                                                                                                                                                                                                                                                                                                                                                                                                          | 0.0309 | 0.0420 | 6 of 10  |
| Killer cell immunoglobulin-like receptor, three domains, long cytoplasmic tail  | 211688_x_at | KIR3DL2 | AF263617  | Immune response, natural killer cell activation, negative regulation of natural killer cell activity, cellular defense response, signal transduction                                                                                                                                                                                                                                                                                                                                                                                                                                                                           | 0.0087 | 0.0002 | 9 of 10  |

|                                                                                 |             |                 |              |                                                                                                                                                                                                                     |        |        |          |
|---------------------------------------------------------------------------------|-------------|-----------------|--------------|---------------------------------------------------------------------------------------------------------------------------------------------------------------------------------------------------------------------|--------|--------|----------|
| Prostaglandin D2 synthase 21kDa (brain) prostaglandin D2 synthase 21kDa (brain) | 211748_x_at | PTGDS           | BC005939     | Prostaglandin and fatty acid biosynthesis, lipid metabolism, transport regulation of circadian sleep/wake cycle, sleep prostaglandin biosynthesis and metabolism, transport                                         | 0.0003 | 0.0037 | 8 of 10  |
| Complement factor B Complement factor B                                         | 211920_at   | CFB             | AF349679     | Proteolysis, complement activation alternative pathway, innate immune response                                                                                                                                      | 0.0022 | 0.0035 | 7 of 10  |
| Chromosome 16 open reading frame 34                                             | 212115_at   | C16orf34        | AK023154     | DNA binding, transcription regulator activity                                                                                                                                                                       | 0.0013 | 0.0000 | 10 of 10 |
| Neuropilin 1                                                                    | 212298_at   | NRP1            | NM_001024628 | Angiogenesis, cell adhesion, signal transduction, cell-cell signaling, nervous system development, axon guidance, positive regulation of cell proliferation, organ morphogenesis, cell differentiation, development | 0.0264 | 0.0213 | 7 of 10  |
| Eukaryotic translation initiation factor 2B, subunit 5 epsilon, 82kDa           | 212351_at   | EIF2B5          | U23028       | Protein biosynthesis, regulation of translation initiation, amino acid metabolism                                                                                                                                   | 0.0226 | 0.0010 | 10 of 10 |
| Transcription factor 4                                                          | 212382_at   | TCF4            | NM_003199    | Negative regulation of transcription from RNA polymerase II promoter, transcription, DNA-dependent regulation of transcription                                                                                      | 0.0001 | 0.0001 | 9 of 10  |
| SET binding factor 1                                                            | 212393_at   | SBF1            | AL096767     | Protein amino acid and phospholipid dephosphorylation                                                                                                                                                               | 0.0030 | 0.0313 | 8 of 10  |
| Rho-related BTB domain containing 1                                             | 212651_at   | RHOBTB1         | AB018283     | Small GTPase mediated signal transduction                                                                                                                                                                           | 0.0249 | 0.0003 | 6 of 10  |
| RAS p21 protein activator 4 hypothetical protein FLJ21767                       | 212707_s_at | RASA4, FLJ21767 | NM_006989    | Intracellular signaling cascade, regulation of small GTPase mediated signal transduction                                                                                                                            | 0.0030 | 0.0365 | 9 of 10  |
| Growth arrest and DNA-damage-inducible, gamma interacting protein 1             | 212891_s_at | GADD45GIP1      | XM_379820    | Cell cycle                                                                                                                                                                                                          | 0.0013 | 0.0000 | 10 of 10 |
| Dual-specificity tyrosine-(Y)-phosphorylation regulated kinase 4                | 212954_at   | DYRK4           | NM_052850    | Protein amino acid phosphorylation, plays key role in cell proliferation, survival and development                                                                                                                  | 0.0013 | 0.0079 | 8 of 10  |
| CD3d molecule, delta (CD3-TCR complex)                                          | 213539_at   | CD3D            | NM_000732    | Protein complex assembly, cell surface receptor linked signal transduction, T cell activation, positive thymic T cell selection                                                                                     | 0.0009 | 0.0491 | 9 of 10  |
| CREB/ATF bZIP transcription factor                                              | 213584_s_at | CREBZF          | NM_001039618 | Transcription, regulation of transcription DNA dependent, response to virus, negative regulation of transcription and gene expression, epigenetic regulation of transcription factor activity                       | 0.0000 | 0.0414 | 8 of 10  |
| Tubulin, beta 2C                                                                | 213726_x_at | TUBB2C          | NM_006088    | Micro-tubule-based movement, natural killer cell mediated cytotoxicity, protein polymerization                                                                                                                      | 0.0315 | 0.0109 | 9 of 10  |
| Phosphodiesterase 4D interacting protein (myomegalin)                           | 214099_s_at | PDE4DIP         | AK001619     | Protein biosynthesis, cytoskeleton organization and biogenesis, actin cytoskeleton organization and biogenesis                                                                                                      | 0.0294 | 0.0039 | 8 of 10  |

|                                                                                      |                        |              |                      |                                                                                                                                                                                                                                                                                                                                                                                                                                                                     |                  |                  |                    |
|--------------------------------------------------------------------------------------|------------------------|--------------|----------------------|---------------------------------------------------------------------------------------------------------------------------------------------------------------------------------------------------------------------------------------------------------------------------------------------------------------------------------------------------------------------------------------------------------------------------------------------------------------------|------------------|------------------|--------------------|
| Collagen, type VIII, alpha 1                                                         | 214587_at              | COL8A1       | NM_001850            | Phosphate transport, cell adhesion, somatic muscle development, major component of basement membrane of corneal epithelium                                                                                                                                                                                                                                                                                                                                          | 0.0096           | 0.0290           | 8 of 10            |
| Somatostatin receptor 2                                                              | 214597_at              | SSTR2        | NM_001050            | Signal transduction G-protein signaling, coupled to cyclic nucleotide second messenger, cell-cell signaling, response to nutrient digestion, negative regulation of cell proliferation, G-protein coupled receptor protein signaling pathway                                                                                                                                                                                                                        | 0.0094           | 0.0095           | 7 of 10            |
| Spectrin, alpha, nonerythrocytic 1 (alpha-fodrin)                                    | 214925_s_at            | SPTAN1       | NM_003127            | Barbed-end actin filament capping                                                                                                                                                                                                                                                                                                                                                                                                                                   | 0.0000           | 0.0000           | 10 of 10           |
| Nucleoporin 62kDa interleukin 4 induced 1                                            | 214935_at              | NUP62, IL411 | NM_012346, NM_172374 | Transport, cell surface receptor linked signal transduction, cell death, negative regulation of cell proliferation, hormone-mediated signaling, negative regulation of apoptosis, negative regulation of non-apoptotic programmed cell death, positive regulation of I-kappaB kinase/NF-kappaB cascade, positive regulation of epidermal growth factor receptor signaling pathway, regulation of Ras protein signal transduction, electron transport, cell adhesion | 0.0181           | 0.0017           | 8 of 10            |
| ST6 beta-galactosamide alpha-2,6-sialyltransferase 1                                 | 214970_s_at            | ST6GAL1      | X17247               | Protein amino acid glycosylation, humoral immune response, development, oligosaccharide metabolism, growth, protein modification                                                                                                                                                                                                                                                                                                                                    | 0.0115           | 0.0287           | 9 of 10            |
| G-rich RNA sequence binding factor 1                                                 | 215030_at              | GRSF1        | AK023187             | mRNA polyadenylation                                                                                                                                                                                                                                                                                                                                                                                                                                                | 0.0188           | 0.0085           | 8 of 10            |
| RAB GTPase activating protein 1                                                      | 215070_x_at            | RABGAP1      | AK022408             | Signal transduction, G-protein coupled receptor protein signaling pathway                                                                                                                                                                                                                                                                                                                                                                                           | 0.0107           | 0.0058           | 9 of 10            |
| Nuclear receptor co-repressor 2                                                      | 215205_x_at            | NCOR2        | S83390               | Regulation of transcription, DNA-dependent regulation of transcription, transcription                                                                                                                                                                                                                                                                                                                                                                               | 0.0106           | 0.0014           | 8 of 10            |
| Solute carrier family 8 (sodium-calcium exchanger), member 2 <sup>D</sup>            | 215267_s_at            | SLC8A2       | NM_015063            | Ion transport, sodium and calcium ion transport, cell communication transport                                                                                                                                                                                                                                                                                                                                                                                       | 0.0256           | 0.0011           | 8 of 10            |
| mRNA sequence, IMAGE clone 446411 <sup>D</sup>                                       | 215477_at              |              | H49077               | Biological function unknown                                                                                                                                                                                                                                                                                                                                                                                                                                         | 0.0459           | 0.0003           | 8 of 10            |
| Zinc finger UBR1 type 1                                                              | 215636_at              | UBR1         | AK022322             | Ubiquitin cycle                                                                                                                                                                                                                                                                                                                                                                                                                                                     | 0.0439           | 0.0000           | 9 of 10            |
| Transcription factor AP-2 beta (activating enhancer binding protein 2 beta)          | 215686_x_at            | TFAP2B       | AL031224             | Transcription, regulation of transcription from RNA polymerase II promoter, nervous system development, regulation of transcription, DNA-dependent. Thought to stimulate cell proliferation and suppress terminal differentiation of specific cell types during embryonic development.                                                                                                                                                                              | 0.0360           | 0.0301           | 5 of 10            |
| Similar to bK246H3.1 (immunoglobulin lambda-like polypeptide 1, pre-B-cell specific) | 215799_at<br>215816_at | LOC91316     | AK024971<br>L02326   | Biological function unknown<br>Carbohydrate metabolism, small GTPase mediated signal transduction                                                                                                                                                                                                                                                                                                                                                                   | 0.0048<br>0.0022 | 0.0000<br>0.0018 | 8 of 10<br>9 of 10 |
| Spectrin, beta, nonerythrocytic 1                                                    | 215918_s_at            | SPTBN1       | NM_003128            | Barbed-end actin filament capping                                                                                                                                                                                                                                                                                                                                                                                                                                   | 0.0105           | 0.0123           | 7 of 10            |
| Hypothetical protein LOC731501                                                       | 216053_x_at            | LOC731501    | XM_001133525         | Biological function unknown                                                                                                                                                                                                                                                                                                                                                                                                                                         | 0.0350           | 0.0158           | 7 of 10            |

|                                                                                               |             |                      |                      |                                                                                                                                      |        |        |          |
|-----------------------------------------------------------------------------------------------|-------------|----------------------|----------------------|--------------------------------------------------------------------------------------------------------------------------------------|--------|--------|----------|
| GTPase activating Rap/RanGap domain-like 3                                                    | 216165_at   | GARNL3               | NM_032293            | GTPase activator activity, small GTPase regulator activity                                                                           | 0.0296 | 0.0002 | 7 of 10  |
| Pleckstrin homology domain containing, family M (with RUN domain) member 1                    | 216200_at   | PLEKHM1              | NM_014798            | Intracellular signaling cascade                                                                                                      | 0.0104 | 0.0001 | 7 of 10  |
| Jerky homolog (mouse)                                                                         | 216309_x_at | JRK                  | AF072467             | Regulation of transcription                                                                                                          | 0.0274 | 0.0000 | 8 of 10  |
| Tenascin XA pseudogene tenascin XB                                                            | 216339_s_at | TNXA, TNXB           | NR_001284, NM_019105 | Cell adhesion, cell-matrix adhesion                                                                                                  | 0.0020 | 0.0000 | 9 of 10  |
| cDNA: FLJ21769 fis, clone COLF7354                                                            | 216429_at   |                      | AK025422             | Biological function unknown                                                                                                          | 0.0158 | 0.0051 | 9 of 10  |
| LOC642150 similar to cationic trypsin III precursor (pretrypsinogen III)                      | 216597_at   | LOC642150            | XR_018089            | Biological function unknown                                                                                                          | 0.0059 | 0.0000 | 9 of 10  |
| Transmembrane 6 superfamily member 2 <sup>E</sup>                                             | 216736_at   | TM6SF2               | AK024515             | Biological function unknown                                                                                                          | 0.0123 | 0.0036 | 7 of 10  |
| Keratin 84                                                                                    | 217031_at   | KRT84                | Y19209               | Structural molecule activity, structural constituent of epidermis, heterodimers with type 1 keratin to form hair and nails           | 0.0490 | 0.0002 | 7 of 10  |
| Protease, serine 7 (enterokinase)                                                             | 217269_s_at | PRSS7                | NM_002772            | Proteolysis                                                                                                                          | 0.0320 | 0.0024 | 8 of 10  |
| PRAME family member 10                                                                        | 217273_at   | PRAMEF10             | AL022101             | Biological function unknown                                                                                                          | 0.0470 | 0.0021 | 8 of 10  |
| Serine hydroxymethyltransferase 1 (soluble)                                                   | 217304_at   | SHMT1                | Y14488               | Glycine metabolism, L-serine metabolism and catabolism, one-carbon compound metabolism                                               | 0.0116 | 0.0031 | 8 of 10  |
| Interleukin 23, alpha subunit p19                                                             | 217328_at   | IL23A                | NM_016584            | Inflammatory and immune response, response to virus, tissue development, innate immune response                                      | 0.0082 | 0.0002 | 8 of 10  |
| Basic transcription factor 3                                                                  | 217461_x_at | BTF3                 | NM_001207            | Transcription, regulation of transcription, DNA-dependent transcription from RNA polymerase II promoter                              | 0.0480 | 0.0357 | 7 of 10  |
| Olfactory receptor, family 7, subfamily e, member 37 pseudogene <sup>G</sup>                  | 217499_x_at | OR7E37P              | AW874308             | Sensory perception of smell                                                                                                          | 0.0003 | 0.0000 | 10 of 10 |
| Cation channel, sperm associated 2 cation channel, sperm associated 2 pseudogene <sup>D</sup> | 217588_at   | CATSPER2, CARSPER2P1 | NM_054020, NR_002318 | Ion transport, transport. Specific to spermatazoa, particularly the flagellum                                                        | 0.0446 | 0.0297 | 4 of 10  |
| Desmoglein 2                                                                                  | 217901_at   | DSG2                 | NM_001943            | Cell adhesion, homophilic cell adhesion                                                                                              | 0.0273 | 0.0176 | 7 of 10  |
| Mitochondrial ribosomal protein L4                                                            | 218105_s_at | MRPL4                | NM_015956            | Protein biosynthesis                                                                                                                 | 0.0480 | 0.0202 | 5 of 10  |
| Fanconi anemia, complementation group L                                                       | 218397_at   | FANCL                | NM_018062            | DNA repair, ubiquitin cycle, response to DNA damage stimulus                                                                         | 0.0254 | 0.0002 | 9 of 10  |
| TBC1 domain family, member 13                                                                 | 218596_at   | TBC1D13              | NM_018201            | GTPase activator activity, Rab GTPase activator activity                                                                             | 0.0410 | 0.0015 | 7 of 10  |
| Phospholipid scramblase 3                                                                     | 218828_at   | PLSCR3               | NM_020360            | Phospholipid scrambling                                                                                                              | 0.0198 | 0.0208 | 9 of 10  |
| Chromosome 2 open reading frame 43                                                            | 219008_at   | C2orf43              | NM_021925            | Hydrolase activity                                                                                                                   | 0.0358 | 0.0001 | 9 of 10  |
| Brevican                                                                                      | 219107_at   | BCAN                 | NM_021948            | Cell adhesion                                                                                                                        | 0.0059 | 0.0000 | 8 of 10  |
| SLAM family member 8 <sup>F</sup>                                                             | 219386_s_at | SLAMF8               | NM_020125            | Immune response, lymphocyte activation, may function during B cell lineage commitment                                                | 0.0046 | 0.0000 | 9 of 10  |
| Placenta-specific 1 <sup>H</sup>                                                              | 219702_at   | PLAC1                | NM_021796            | Placenta development                                                                                                                 | 0.0141 | 0.0003 | 9 of 10  |
| Galactose-3-O-sulfotransferase 4                                                              | 219815_at   | GAL3ST4              | NM_024637            | Sulfur metabolism, cell-cell signaling, biosynthesis, glycoprotein metabolism, oligosaccharide metabolism, proteoglycan biosynthesis | 0.0057 | 0.0000 | 10 of 10 |
| Glycerophosphodiester phosphodiesterase domain containing 2 <sup>E</sup>                      | 220291_at   | GDPD2                | NM_017711            | Glycerol metabolism                                                                                                                  | 0.0079 | 0.0067 | 8 of 10  |



|                                                                               |             |             |           |                                                                                                                                                                                                                                                                             |        |        |          |
|-------------------------------------------------------------------------------|-------------|-------------|-----------|-----------------------------------------------------------------------------------------------------------------------------------------------------------------------------------------------------------------------------------------------------------------------------|--------|--------|----------|
| Signal-regulatory protein gamma <sup>D</sup>                                  | 220485_s_at | SIRPG       | NM_018556 | Intracellular signaling cascade, cell-cell signaling, negative regulation of cell proliferation                                                                                                                                                                             | 0.0235 | 0.0104 | 7 of 10  |
| Testis-specific kinase substrate                                              | 220545_s_at | TSKS        | NM_021733 | Protein binding. Gene may play a role in testicular physiology, spermatogenesis, or spermiogenesis                                                                                                                                                                          | 0.0163 | 0.0006 | 7 of 10  |
| Hypothetical protien FLJ11783                                                 | 220546_at   | FLJ11783    | NM_024891 | Biological function unknown                                                                                                                                                                                                                                                 | 0.0485 | 0.0002 | 7 of 10  |
| Disabled homolog 1 (Drosophila)                                               | 220611_at   | DAB1        | NM_021080 | Nervous system development, cell differentiation, development                                                                                                                                                                                                               | 0.0339 | 0.0033 | 7 of 10  |
| Roundabout homolog 4, magic roundabout (Drosophila) <sup>E</sup>              | 220687_at   | ROBO4       | NM_018175 | Biological function unknown                                                                                                                                                                                                                                                 | 0.0002 | 0.0002 | 9 of 10  |
|                                                                               | 220758_s_at |             | NM_019055 | Angiogenesis, cell differentiation, regulation of cell migration, angiogenesis, development                                                                                                                                                                                 | 0.0480 | 0.0000 | 7 of 10  |
| hCG 1732469                                                                   | 220823_at   | hCG_1732469 | NM_017624 | Biological function unknown                                                                                                                                                                                                                                                 | 0.0368 | 0.0125 | 8 of 10  |
| WD repeats and SOF 1 domain containing                                        | 220843_s_at | WDSOF1      | NM_014156 | Regulation of nucleobase, nucleoside, nucleotide and nucleic acid metabolism                                                                                                                                                                                                | 0.0275 | 0.0276 | 8 of 10  |
| Unc-51-like kinase 4 (C elegans)                                              | 220958_at   | ULK4        | NM_017886 | Protein amino acid phosphorylation                                                                                                                                                                                                                                          | 0.0065 | 0.0002 | 9 of 10  |
| Integral membrane protein 2C integral membrane protein 2C                     | 221004_s_at | ITM2C       | NM_030926 | ATP binding                                                                                                                                                                                                                                                                 | 0.0017 | 0.0000 | 9 of 10  |
| Natural cytotoxicity triggering receptor 2 <sup>D</sup>                       | 221074_at   | NCR2        | NM_004828 | Cellular defense response, signal transduction                                                                                                                                                                                                                              | 0.0254 | 0.0158 | 7 of 10  |
| 2-oxoglutarate and iron-dependent oxygenase domain containing 1               | 221090_s_at | OGFOD1      | NM_018233 | Protein metabolism                                                                                                                                                                                                                                                          | 0.0371 | 0.0421 | 8 of 10  |
| Growth differentiation factor 9 <sup>D</sup>                                  | 221314_at   | GDF9        | NM_005260 | Transforming growth factor beta receptor, signaling pathway, female gamete generation                                                                                                                                                                                       | 0.0244 | 0.0426 | 6 of 10  |
| Cholinergic receptor, muscarinic 5 <sup>D</sup>                               | 221347_at   | CHRM5       | NM_012125 | Nervous system development, signal transduction, muscarinic acetylcholine receptor, adenylate cyclase inhibiting pathway, acetylcholine receptor signaling muscarinic pathway, cell proliferation, G-protein coupled receptor protein signaling pathway                     | 0.0068 | 0.0001 | 8 of 10  |
| Hypothetical protein LOC339047                                                | 221501_x_at | LOC339047   | AF229069  | Neuropeptide signaling pathway                                                                                                                                                                                                                                              | 0.0109 | 0.0017 | 7 of 10  |
| Par-3 partitioning defective 3 homolog (C elegans)                            | 221526_x_at | PARD3       | NM_019619 | Protein complex assembly cell cycle establishment and/or maintenance of cell polarity, protein kinase C activation, axonogenesis, asymmetric cell division, cell division                                                                                                   | 0.0389 | 0.0000 | 8 of 10  |
| MAP/microtubule affinity-regulating kinase 4                                  | 221560_at   | MARK4       | AB049127  | Microtubule bundle formation, protein amino acid phosphorylation, nervous system development, positive regulation of programmed cell death, microtubule cytoskeleton organization and biogenesis, positive regulation of cell proliferation, Wnt receptor signaling pathway | 0.0005 | 0.0001 | 9 of 10  |
| RRN3 RNA polymerase 1 transcription factor homolog (S. cerevisiae) pseudogene | 221714_s_at | LOC730092   | BC006441  | Biological function unknown                                                                                                                                                                                                                                                 | 0.0455 | 0.0001 | 7 of 10  |
| Zinc finger protein 512B                                                      | 221869_at   | ZNF512B     | NM_020713 | Transcription, regulation of transcription, DNA-dependent                                                                                                                                                                                                                   | 0.0007 | 0.0000 | 10 of 10 |

|                                                          |                 |          |           |                                                                                                                              |        |        |         |
|----------------------------------------------------------|-----------------|----------|-----------|------------------------------------------------------------------------------------------------------------------------------|--------|--------|---------|
| aarF domain containing kinase 2                          | 222117_s_at     | ADCK2    | NM_052853 | ATP binding, kinase activity, nucleotide binding, transferase activity                                                       | 0.0000 | 0.0109 | 8 of 10 |
| Similar to Zinc finger protein 418                       | 222135_at       | LOC73051 | XR_015766 | Regulation of transcription, DNA-dependent                                                                                   | 0.0462 | 0.0004 | 8 of 10 |
| Splicing factor 3a, subunit 2, 66kDa                     | 37462_i_at      | SF3A2    | L21990    | Nuclear mRNA 3'-splice site recognition, nuclear mRNA splicing, via spliceosome RNA splicing mRNA processing                 | 0.0353 | 0.0231 | 6 of 10 |
| Hydroxysteroid (17-beta) dehydrogenase 6 homolog (mouse) | 37512_at        | HSD17B6  | U89281    | Androgen biosynthesis, catabolism and metabolism                                                                             | 0.0014 | 0.0226 | 7 of 10 |
| CD22 molecule/myelin-associated glycoprotein             | 38521_at        | CD22MAG  | X59350    | Involved in the process of myelination, cell adhesion, cell-cell adhesion, antimicrobial humoral response (sensu Vertebrata) | 0.0007 | 0.0406 | 8 of 10 |
| Acetyl-Coenzyme A carboxylase beta                       | 49452_at        | ACACB    | NM_001093 | Fatty acid biosynthesis metabolism, lipid biosynthesis                                                                       | 0.0193 | 0.0105 | 7 of 10 |
|                                                          | AFFX-BioDn-3_at |          |           | Biotin biosynthesis metabolism, biosynthesis, cobalamin biosynthesis                                                         | 0.0365 | 0.0101 | 7 of 10 |

<sup>A</sup>Adjusted p values for antepartum vs. postpartum samples

<sup>B</sup>Adjusted p values for umbilical vs. postpartum samples

<sup>C</sup>Proportion of cases with expression values where antepartum>postpartum and umbilical>postpartum

<sup>D</sup>Fetal specific expression pattern

<sup>E</sup>Embryo specific expression pattern

<sup>F</sup>Neonate specific expression pattern

<sup>G</sup>Expression pattern restricted to embryo

<sup>H</sup>Placental/fetal specific expression pattern

**Supplemental Table 2. Real-time RT-PCR Data.** All samples were run in triplicate and the value listed is the mean quantity expressed as ng/mL of whole blood. Coefficient of variation values, (CV), are also provided. *GAPDH* was included as a housekeeping gene.

|     | <i>GAPDH</i> ng/mL<br>(CV) | <i>DEFA1, DEFA3</i> ng/mL<br>(CV) | <i>TRBV19, TRBC1</i> ng/mL<br>(CV) | <i>MYL4</i> ng/mL<br>(CV) |
|-----|----------------------------|-----------------------------------|------------------------------------|---------------------------|
| 2A  | 3,122 (19.8)               | 18,352 (10.2)                     | 54,192 (12.2)                      | 1,538 (65.2)              |
| 2U  | 24,788 (5.30)              | 2,505,424 (42.6)                  | 312,320 (36.3)                     | 33,104 (59)               |
| 2P  | 5,956 (18.5)               | 51,456 (14.6)                     | 280,288 (66.1)                     | 15,792 (30.5)             |
| 3A  | 1,780 (3.4)                | 52,192 (9.8)                      | 133,248 (17.7)                     | 7,872 (20.5)              |
| 3U  | 10,796 (23.2)              | 1,248,576 (9.4)                   | 452,864 (5.5)                      | 29,680 (23.5)             |
| 3P  | 3,104 (23.4)               | 43,920 (19.8)                     | 198,336 (17.5)                     | 15,396 (7.4)              |
| 4A  | 7,968 (27.5)               | 107,104 (9.6)                     | 99,840 (8.9)                       | 6,386 (12)                |
| 4Ua | 9,564 (4.5)                | 109,536 (0.7)                     | 397,216 (0.2)                      | 69,644 (36.6)             |
| 4Ub | 69,874 (8.7)               | 99,312 (4.4)                      | 266,368 (10.7)                     | 28,480 (25.6)             |
| 4P  | 2,022 (6.3)                | 7,040 (22)                        | 36,912 (9.7)                       | 909 (10.7)                |
| 5A  | 7,740 (21.9)               | 47,200 (15.1)                     | 89,584 (40.7)                      | 2,713 (42.2)              |
| 5U  | 29,340 (13.9)              | 3,189,760 (12.5)                  | 522,464 (2)                        | 52,688 (21.4)             |
| 5P  | 26,772 (9.3)               | 53,888 (4.1)                      | 159,632 (7)                        | 5,018 (17.5)              |
| 6A  | 3,080 (6.2)                | 40,944 (20)                       | 72,432 (7.2)                       | 1,062 (39)                |
| 6U  | 11,052 (23.9)              | 198,400 (10.4)                    | 268,208 (6.9)                      | 13,783 (10.2)             |
| 6P  | 18,420 (22.6)              | 52,208 (9.8)                      | 79,232 (2.2)                       | 1,375 (19.7)              |

A=Antepartum; U=Umbilical; P=Postpartum  
Sample 3Ua=Twin A; Sample 3Ub= Twin B

**Supplemental Table 3. Maternal and Fetal Genotyping for SNP Analysis.** Two of the three informative pairs for *KIR3DL2*, *rs21168*, revealed evidence of fetal RNA trafficking. *CD19*, *rs2904880*, was positive for fetal trafficking in a retrospective analysis of original stored cDNA samples.

| <b>Genotype (Maternal/Fetal)</b> | <b><i>SNP CD19, rs2904880</i></b> | <b><i>SNP KIR3DL2, rs21168</i></b> |
|----------------------------------|-----------------------------------|------------------------------------|
| Homozygous/Homozygous            | 6/11 (55%)                        | 5/11 (45%)                         |
| Heterozygous/Heterozygous        | 2/11 (18%)                        | 2/11 (18%)                         |
| Heterozygous/Homozygous          | 2/11 (18%)                        | 1/11 (9%)                          |
| <b>Homozygous/Heterozygous*</b>  | <b>1/11 (9%)</b>                  | <b>3/11 (27%)</b>                  |

\*Informative Maternal-Fetal Pair

**Supplemental Table 4.** Candidate fetal genes in plasma

| Gene                                                                                     | Probe set ID | Gene Symbol | Accession Number | Biological function                                                                                                                                                                                      | p value <sup>A</sup> | p value <sup>B</sup> |
|------------------------------------------------------------------------------------------|--------------|-------------|------------------|----------------------------------------------------------------------------------------------------------------------------------------------------------------------------------------------------------|----------------------|----------------------|
| Ribosomal protein L27                                                                    | 200025_s_at  | RPL27       | NM_000988        | Protein biosynthesis                                                                                                                                                                                     | 0.0146               | 0.0451               |
| DEAD (Asp-Glu-Ala-Asp) box polypeptide 5                                                 | 200033_at    | DDX5        | NM_004396        | Cell growth. Some members of this family are believed to be involved in embryogenesis, spermatogenesis and cellular growth                                                                               |                      |                      |
| ADP-ribosylation factor 1                                                                | 200065_s_at  | ARF1        | AF052179         | rRNA processing, ER to Golgi vesicle-mediated transport, small GTPase mediated signal transduction, protein transport, transport, ribosome biogenesis                                                    | 0.0000               | 0.0130               |
| Heterogeneous nuclear ribonucleoprotein D (AU-rich element RNA binding protein 1, 37kDa) | 200073_s_at  | HNRPD       | M94630           | Telomere maintenance, transcription, regulation of transcription, DNA-dependent RNA processing, RNA catabolism, mRNA catabolism                                                                          | 0.0313               | 0.0000               |
| Dynein, light chain, LC8-type 1                                                          | 200703_at    | DYNLL1      | NM_003746        | Microtubule-based process. Physically interacts with and inhibits the activity of neuronal NO synthetase dimer. Female gamete generation, morphogenesis, actin cytoskeleton, organization and biogenesis | 0.0000               | 0.0000               |
| Methionine adenosyltransferase II, alpha                                                 | 200768_s_at  | MAT2A       | BC001686         | One-carbon compound metabolism, S-adenosylmethionine biosynthesis                                                                                                                                        | 0.0000               | 0.0249               |
| Proteasome (prosome, macropain) 26S subunit, non-ATPase 8                                | 200820_at    | PSMD8       | NM_002812        | Regulation of progression through cell cycle, proteolysis                                                                                                                                                | 0.0469               | 0.0461               |
| Lysyl-tRNA synthetase                                                                    | 200840_at    | KARS        | NM_005548        | Protein biosynthesis, lysyl-tRNA aminoacylation, tRNA processing, tRNA aminoacylation for protein translation, protein biosynthesis                                                                      | 0.0056               | 0.0000               |
| RAB14, member RAS oncogene family                                                        | 200928_s_at  | RAB14       | AL162081         | Golgi to endosome transport, small GTPase mediated signal transduction, neurotransmitter secretion, protein transport, vesicle-mediated transport, intracellular transport                               | 0.0206               | 0.0477               |
| Ribophorin I                                                                             | 201011_at    | RPN1        | NM_002950        | Protein amino acid glycosylation, protein amino acid N-linked glycosylation via asparagine protein modification                                                                                          | 0.0000               | 0.0002               |
| NHP2 non-histone chromosome protein 2-like 1 (S. cerevisiae)                             | 201077_s_at  | NHP2L1      | AF155235         | Regulation of progression through cell cycle, nuclear mRNA splicing, via spliceosome, ribosome biogenesis and assembly mRNA processing                                                                   | 0.0051               | 0.0001               |
| Carboxypeptidase E                                                                       | 201116_s_at  | CPE         | NM+001873        | Protein modification, proteolysis, neuropeptide signaling pathway, metabolism                                                                                                                            | 0.0018               | 0.0000               |
| Ribosome binding protein 1 homolog 180kDa (dog)                                          | 201203_s_at  | RRBP1       | NM_001042576     | Protein biosynthesis, protein targeting, signal transduction, protein transport, transport endocytosis                                                                                                   | 0.0000               | 0.0002               |
| Topoisomerase (DNA) II alpha 170kDa                                                      | 201291_s_at  | TOP2A       | NM_001067        | DNA replication, topological change, unwinding during replication, repair, phosphoinositide-mediated signaling, metabolism                                                                               | 0.0000               | 0.0044               |
| Protein phosphatase 1, catalytic subunit, beta isoform                                   | 201409_s_at  | PPP1CB      | NM_002709        | Carbohydrate and glycogen metabolism, cell cycle, cell division                                                                                                                                          | 0.0000               | 0.0057               |
| Ubiquitin-like 3                                                                         | 201535_at    | UBL3        | NM_007106        | Protein modification                                                                                                                                                                                     | 0.0001               | 0.0000               |
| Eukaryotic translation termination factor 1                                              | 201573_s_at  | ETF1        | M75715           | Protein biosynthesis, translational termination                                                                                                                                                          | 0.0000               | 0.0214               |
| Protein phosphatase 1, regulatory (inhibitor) subunit 12A                                | 201603_at    | PPP1R12A    | NM_002480        | Regulation of muscle contraction                                                                                                                                                                         | 0.0073               | 0.0404               |
| Fragile X mental retardation, autosomal homolog 1                                        | 201635_s_at  | FXR1        | NM_001013438     | Apoptosis, striated muscle development, cell differentiation, development                                                                                                                                | 0.0029               | 0.0004               |
| Cleavage and polyadenylation specific factor 1, 160kDa                                   | 201639_s_at  | CPSF1       | NM_013291        | mRNA polyadenylation, cleavage and processing                                                                                                                                                            | 0.0232               | 0.0380               |
| Integrin, alpha 6                                                                        | 201656_at    | ITGA6       | NM_000210        | Cell-substrate junction assembly, cell adhesion, cell-matrix adhesion, integrin-mediated signaling pathway                                                                                               | 0.0073               | 0.0480               |
|                                                                                          |              |             |                  |                                                                                                                                                                                                          | 0.0000               | 0.0003               |

|                                                                                                   |             |         |              |                                                                                                                                                                                                                                              |        |        |
|---------------------------------------------------------------------------------------------------|-------------|---------|--------------|----------------------------------------------------------------------------------------------------------------------------------------------------------------------------------------------------------------------------------------------|--------|--------|
| Oxysterol binding protein                                                                         | 201800_s_at | OSBP    | AF185696     | Lipid transport, steroid metabolism, transport                                                                                                                                                                                               | 0.0296 | 0.0000 |
| SEC63-like (S. cerevisiae)                                                                        | 201916_s_at | SEC63   | NM_007214    | Protein folding, protein targeting to membrane, protein transport                                                                                                                                                                            | 0.0422 | 0.0130 |
| Plakophilin 4                                                                                     | 201928_at   | PKP4    | NM_001005476 | Cell adhesion                                                                                                                                                                                                                                | 0.0000 | 0.0001 |
| Optineurin                                                                                        | 202074_s_at | OPTN    | NM_021980    | Protein C-terminus binding                                                                                                                                                                                                                   | 0.0295 | 0.0030 |
| Nucleoporin 153kDa                                                                                | 202097_at   | NUP153  | NM_005124    | Transport, ATP synthesis, couple proton transport                                                                                                                                                                                            | 0.0002 | 0.0000 |
| Zinc finger, MYND domain containing 11                                                            | 202137_s_at | ZMYND11 | NM_006624    | Negative regulation of transcription from RNA polymerase II promoter, transcription, regulation of transcription, DNA-dependent cell cycle cell proliferation                                                                                | 0.0008 | 0.0499 |
| COP9 constitutive photomorphogenic homolog subunit 8 (Arabidopsis)                                | 202143_s_at | COPS8   | NM_006710    | Metabolism                                                                                                                                                                                                                                   | 0.0438 | 0.0000 |
| Transmembrane emp24 protein transport domain containing 5                                         | 202194_at   | TMED5   | AL117354     | Transport                                                                                                                                                                                                                                    | 0.0049 | 0.0179 |
| Integrin, alpha V (vitronectin receptor, alpha polypeptide, antigen CD51)                         | 202351_at   | ITGAV   | NM_002210    | Cell adhesion, cell-matrix adhesion, integrin-mediated signaling pathway                                                                                                                                                                     | 0.0000 | 0.0000 |
| Brain abundant membrane attached signal protein 1                                                 | 202391_at   | BASP1   | NM_006317    |                                                                                                                                                                                                                                              | 0.0000 | 0.0271 |
| Endosulfine alpha                                                                                 | 202596_at   | ENSA    | BC000436     | Transport, response to nutrient                                                                                                                                                                                                              | 0.0053 | 0.0000 |
| Serine threonine kinase 39 (STE20/SPS1 homolog, yeast)                                            | 202786_at   | STK39   | NM_013233    | Protein amino acid phosphorylation, response to stress                                                                                                                                                                                       | 0.0000 | 0.0094 |
| Developmentally regulated GTP binding protein 1                                                   | 202810_at   | DRG1    | NM_004147    | Transcription, development                                                                                                                                                                                                                   | 0.0000 | 0.0253 |
| Bromodomain adjacent to zinc finger domain, 2B                                                    | 203080_s_at | BAZ2B   | NM_013450    | Transcription, regulation of transcription, DNA-dependent                                                                                                                                                                                    | 0.0122 | 0.0011 |
| MAD2 mitotic arrest deficient-like 1 (yeast)                                                      | 203362_s_at | MAD2L1  | NM_002358    | Cell cycle mitosis, mitotic checkpoint, cell division mitosis                                                                                                                                                                                | 0.0401 | 0.0054 |
| Potassium voltage-gated channel, shaker-related subfamily, beta member 2                          | 203402_at   | KCNAB2  | NM_003636    | Ion transport, potassium ion transport, transport                                                                                                                                                                                            | 0.0000 | 0.0000 |
| 2,3-bisphosphoglycerate mutase                                                                    | 203502_at   | BPGM    | NM_001724    | Carbohydrate metabolism, glycolysis, respiratory gaseous exchange, metabolism                                                                                                                                                                | 0.0000 | 0.0419 |
| ADP-ribosylation factor-like 4D                                                                   | 203587_at   | ARL4D   | NM_001661    | rRNA processing, small GTPase mediated signal transduction, protein secretion, ribosome biogenesis                                                                                                                                           | 0.0278 | 0.0000 |
| Pericentrin (kendrin)                                                                             | 203660_s_at | PCNT    | NM_006031    | Cilium biogenesis                                                                                                                                                                                                                            | 0.0251 | 0.0000 |
| Vascular cell adhesion molecule 1                                                                 | 203868_s_at | VCAM1   | NM_001078    | Cell-cell adhesion, cell adhesion                                                                                                                                                                                                            | 0.0480 | 0.0000 |
| Arginase, type II                                                                                 | 203945_at   | ARG2    | NM_001172    | Urea cycle arginine catabolism, nitric oxide biosynthesis, arginine metabolism                                                                                                                                                               | 0.0161 | 0.0025 |
| ZW10 interactor                                                                                   | 204026_s_at | ZWINT   | NM_007057    | Cell cycle spindle organization and biogenesis, phosphoinositide-mediated signaling                                                                                                                                                          | 0.0007 | 0.0000 |
| Solute carrier family 5 (sodium-dependent vitamin transporter), member 6                          | 204087_s_at | SLC5A6  | NM_021095    | Ion transport, sodium ion transport, transport                                                                                                                                                                                               | 0.0189 | 0.0282 |
| SWI/SNF related, matrix associated, actin dependent regulator of chromatin, subfamily d, member 3 | 204099_at   | SMARCD3 | NM_003078    | Chromatin remodeling, transcription, regulation of transcription for RNA polymerase II promoter, positive regulation of transcription, DNA-dependent regulation of transcription, DNA-dependent chromatin modification                       | 0.0131 | 0.0000 |
| Cyclin-dependent kinase 2                                                                         | 204252_at   | CDK2    | M68520       | G2/M transition of mitotic cell cycle, regulation of DNA replication, protein amino acid phosphorylation, cell cycle mitosis, traversing start control point of mitotic cell cycle; positive regulation of cell proliferation, cell division | 0.0073 | 0.0000 |
| Regulator of G-protein signaling 10                                                               | 204319_s_at | RGS10   | NM_002925    | Negative regulation of signal transduction                                                                                                                                                                                                   | 0.0003 | 0.0014 |
| LIM domain only 3 (rhombotin-like 2)                                                              | 204424_s_at | LMO3    | AL050152     | Transcription, regulation of transcription, DNA-dependent                                                                                                                                                                                    | 0.0111 | 0.0010 |
|                                                                                                   | 204536_s_at |         | NM_005612    | Regulation of transcription, DNA-dependent                                                                                                                                                                                                   | 0.0429 | 0.0000 |
| Cell adhesion molecule with homology to L1CMA (close homolog of L1)                               | 204591_at   | CHL1    | NM_006614    | Cell adhesion, signal transduction, nervous system development, cell differentiation, cell adhesion, development                                                                                                                             | 0.0002 | 0.0000 |
| Folate receptor 2 (fetal)                                                                         | 204829_s_at | FOLR2   | NM_000803    | Folic acid transport                                                                                                                                                                                                                         | 0.0000 | 0.0026 |

|                                                                                  |                            |                 |                        |                                                                                                                                                                                                                                                          |                  |                  |
|----------------------------------------------------------------------------------|----------------------------|-----------------|------------------------|----------------------------------------------------------------------------------------------------------------------------------------------------------------------------------------------------------------------------------------------------------|------------------|------------------|
| Vaccinia related kinase 2                                                        | 205126_at                  | VRK2            | NM_006296              | Protein amino acid phosphorylation, response to stress                                                                                                                                                                                                   | 0.0000           | 0.0000           |
| POU domain, class 2, associating factor 1                                        | 205267_at                  | POU2AF1         | NM_006235              | Transcription, regulation of transcription, DNA-dependent, transcription from RNA polymerase II promoter, humoral immune response, cell cycle arrest, negative regulation of cell proliferation, neuron differentiation                                  | 0.0000           | 0.0000           |
| Proline-rich protein HaellI subfamily 1; proline-rich protein HaellI subfamily 2 | 205272_s_at                | PRH1, PRH2      | NM_006250              | G-protein coupled receptor protein signaling pathway                                                                                                                                                                                                     | 0.0251           | 0.0012           |
| BAI1-associated protein 2                                                        | 205293_x_at                | BAIAP2          | AB017120               | Rho protein signal transduction, axonogenesis, insulin receptor signaling pathway                                                                                                                                                                        | 0.0000           | 0.0013           |
| Claudin 10                                                                       | 205328_at                  | CLDN10          | NM_006984              | Cell adhesion, calcium-independent cell-cell adhesion                                                                                                                                                                                                    | 0.0000           | 0.0360           |
| Neuropeptide Y receptor Y1                                                       | 205440_s_at                | NPY1R           | NM_000909              | Signal transduction G-protein signaling, coupled to cyclic nucleotide second messenger G-protein signaling, adenylate cyclase inhibiting pathway, neuropeptide signaling pathway, feeding behavior, G-protein coupled receptor protein signaling pathway | 0.0000           | 0.0005           |
| Fragile histidine triad gene                                                     | 206492_at                  | FHIT            | NM_002012              | Cell cycle, nucleotide metabolism, negative regulation of progression through cell cycle                                                                                                                                                                 | 0.0010           | 0.0000           |
| SET domain and mariner transposase fusion gene                                   | 206554_x_at                | SETMAR          | NM_006515              | Transposition, DNA-mediated chromatin modification, regulation of transcription                                                                                                                                                                          | 0.0033           | 0.0000           |
| Coagulation factor II (thrombin) receptor-like 2                                 | 206795_at                  | F2RL2           | NM_004101              | Signal transduction, G-protein signaling pathway, blood coagulation, response to wounding                                                                                                                                                                | 0.0006           | 0.0000           |
| Alanine-glyoxylate aminotransferase                                              | 206957_at                  | AGXT            | NM_016236              | Metabolism                                                                                                                                                                                                                                               | 0.0000           | 0.0000           |
| ATPase, Ca <sup>++</sup> transporting, plasma memberane 3                        | 207026_s_at                | ATP2B3          | NM_021949              | Cation transport, calcium ion transport, metabolism, transport, ion transport, transport                                                                                                                                                                 | 0.0000           | 0.0000           |
| Distal-less homeobox 2                                                           | 207147_at                  | DLX2            | NM_004405              | Regulation of transcription, DNA-dependent, development, brain development, regulation of transcription                                                                                                                                                  | 0.0001           | 0.0109           |
| NADPH oxidase 1                                                                  | 207217_s_at                | NOX1            | NM_013955              | Electron, proton and ion transport, NADP and FADH2 metabolism                                                                                                                                                                                            | 0.0019           | 0.0000           |
| Solute carrier family 17 (sodium phosphate), member 3                            | 207298_at                  | SLC17A3         | NM_006632              | Phosphate metabolism, ion and sodium ion transport, transport                                                                                                                                                                                            | 0.0335           | 0.0000           |
| POU class 1, homeobox 1                                                          | 207478_at<br>207846_at     | POU1F1          | NM_018546<br>NM_000306 | Biological function unknown<br>Regulation of transcription, DNA-dependent transcription from RNA polymerase II promoter, negative regulation of cell proliferation, organ morphogenesis                                                                  | 0.0004           | 0.0049           |
| H2B histone family, member S                                                     | 208579_x_at                | H2BFS           | NM_017445              | Nucleosome assembly, chromosome organization and biogenesis (sensu Eukaryota), response to bacteria, pest, pathogen or parasite                                                                                                                          | 0.0000           | 0.0213           |
| Villin 2 (ezrin)                                                                 | 208621_s_at                | VIL2            | NM_003379              | Cytoskeletal anchoring, regulation of cell shape, actin filament bundle formation                                                                                                                                                                        | 0.0001           | 0.0349           |
| Serine incorporator 1                                                            | 208671_at                  | SERINC1         | AF164794               | Phosphatidylserine metabolism, sphingolipid metabolism, L-serine transport positive regulation of transferase activity                                                                                                                                   | 0.0008           | 0.0000           |
| Melanoma antigen family D, 2<br>Sin3A-associated protein, 18kDa                  | 208682_s_at<br>208742_s_at | MAGED2<br>SAP18 | AF126181<br>U78303     | Protein biosynthesis<br>Transcription, regulation of transcription from RNA polymerase II promoter, regulation of transcription, DNA-dependent                                                                                                           | 0.0001<br>0.0000 | 0.0001<br>0.0000 |
|                                                                                  |                            |                 |                        |                                                                                                                                                                                                                                                          | 0.0416           | 0.0000           |

|                                                                                                       |             |               |           |                                                                                                                                                                                                                                                                                                                             |        |        |
|-------------------------------------------------------------------------------------------------------|-------------|---------------|-----------|-----------------------------------------------------------------------------------------------------------------------------------------------------------------------------------------------------------------------------------------------------------------------------------------------------------------------------|--------|--------|
| High-mobility group box 2                                                                             | 208808_s_at | HMGB2         | BC000903  | DNA ligation, replication and unwinding during replication, DNA repair, base-excision repair, establishment and/or maintenance of chromatin architecture, nucleosome assembly, regulation of transcription from RNA polymerase II promoter, phosphoinositide-mediated signaling, regulation of transcription, DNA-dependent |        |        |
|                                                                                                       |             |               |           |                                                                                                                                                                                                                                                                                                                             | 0.0049 | 0.0128 |
| Topoisomerase (DNA) 1                                                                                 | 208901_s_at | TOP1          | J03250    | DNA topological change, DNA unwinding during replication                                                                                                                                                                                                                                                                    | 0.0000 | 0.0019 |
| Platelet/endothelial cell adhesion molecule (CD31 antigen)                                            | 208982_at   | PECAM1        | NM_000442 | Cell motility, adhesion, recognition, signal transduction                                                                                                                                                                                                                                                                   | 0.0000 | 0.0117 |
| Heterogeneous nuclear ribonucleoprotein H3 (2H9)                                                      | 208990_s_at | HNRPH3        | AF132362  | Nuclear mRNA splicing, via spliceosome, RNA splicing and processing, mRNA processing                                                                                                                                                                                                                                        | 0.0000 | 0.0036 |
| GABA (A) receptor-associated protein-like 2                                                           | 209046_s_at | GABARAPL2     | AB030710  | Protein targeting and transport, synaptic transmission,                                                                                                                                                                                                                                                                     | 0.0003 | 0.0002 |
| Hepatoma-derived growth factor, related protein 3                                                     | 209526_s_at | HDGFRP3       | AB029156  | Cell proliferation                                                                                                                                                                                                                                                                                                          | 0.0000 | 0.0000 |
| Integrin, alpha 7                                                                                     | 209663_s_at | ITGA7         | AF072132  | Cell adhesion, homophilic cell adhesion, cell-matrix adhesion, integrin-mediated signaling pathway, muscle development, regulation of cell shape                                                                                                                                                                            | 0.0023 | 0.0000 |
| Annexin A2                                                                                            | 210427_x_at | ANXA2         | BC001388  | Skeletal development                                                                                                                                                                                                                                                                                                        | 0.0000 | 0.0075 |
| Colony stimulating factor 1 (macrophage)                                                              | 210557_x_at | CSF1          | M76453    | Cell proliferation and differentiation, positive regulation of cell proliferation, hemopoiesis, macrophage differentiation                                                                                                                                                                                                  | 0.0351 | 0.0014 |
| Tachykinin receptor 1                                                                                 | 210637_at   | TACR1         | M81797    | Inflammatory response, signal transduction, G-protein coupled receptor protein signaling pathway, G-protein signaling, coupled to IP3 second messenger (phospholipase C activation) tachykinin signaling pathway, mechanosensory behavior, detection of abiotic stimulus, behavior                                          |        |        |
|                                                                                                       |             |               |           |                                                                                                                                                                                                                                                                                                                             | 0.0000 | 0.0001 |
| Regucalcin (senescence marker protein-30)                                                             | 210751_s_at | RGN           | D31815    | Calcium ion binding, enzyme regulator activity                                                                                                                                                                                                                                                                              | 0.0000 | 0.0000 |
| Tubulin tyrosine ligase-like family, member 5                                                         | 210806_at   | TTL5          | AL136808  | Protein modification                                                                                                                                                                                                                                                                                                        | 0.0196 | 0.0063 |
| Hepatocyte growth factor (hepapoietin A; scatter factor)                                              | 210997_at   | HGF           | M77227    | Proteolysis, mitosis, blood coagulation                                                                                                                                                                                                                                                                                     | 0.0156 | 0.0000 |
| Pyruvate dehydrogenase (lipoamide) beta                                                               | 211023_at   | PDHB          | AL117618  | Glucose metabolism, glycolysis, tricarboxylic acid cycle                                                                                                                                                                                                                                                                    | 0.0000 | 0.0000 |
| Glycogenin 1                                                                                          | 211275_s_at | GYG1          | AF087942  | Glycogen and carbohydrate biosynthesis                                                                                                                                                                                                                                                                                      | 0.0000 | 0.0000 |
| CDKN1A interacting zinc finger protein 1                                                              | 211358_s_at | CIZ1          | AF234161  | Regulation of progression through cell cycle                                                                                                                                                                                                                                                                                | 0.0204 | 0.0113 |
| Sperm associated antigen 11B                                                                          | 211381_x_at | SPAG11B       | AF168617  | Defense response, response to pest, pathogen or parasite, spermatogenesis                                                                                                                                                                                                                                                   | 0.0000 | 0.0000 |
| POZ (BTB) and AT hook containing zinc finger                                                          | 211392_s_at | PATZ1         | AF242522  | Transcription, regulation of transcription, DNA-dependent                                                                                                                                                                                                                                                                   | 0.0002 | 0.0000 |
| Aminolevulinatase, delta-synthase 2 (sideroblastic/hypochromic anemia)                                | 211560_s_at | ALAS2         | NM_000032 | Heme biosynthesis, metabolism                                                                                                                                                                                                                                                                                               | 0.0000 | 0.0060 |
| RNA guanylyltransferase and 5'-phosphatase                                                            | 211849_s_at | RNGTT         | AB009023  | mRNA capping protein amino acid dephosphorylation                                                                                                                                                                                                                                                                           | 0.0021 | 0.0003 |
| CDNA: FLJ22515 fis, clone HRC12122, highly similar to AF052101 Homo sapiens clone 23872 mRNA sequence | 211976_at   |               | AK026168  | Biological function unknown                                                                                                                                                                                                                                                                                                 | 0.0109 | 0.0000 |
| LSM14, SCD6 homolog A (S. cerevisiae)                                                                 | 212132_at   | LSM14A        | NM_015578 | Biological function unknown                                                                                                                                                                                                                                                                                                 | 0.0009 | 0.0096 |
| Suppressor of zeste 12 homolog (Drosophila)                                                           | 212287_at   | SUZ12         | NM_015355 | Transcription, regulation of transcription, DNA-dependent, chromatin modification                                                                                                                                                                                                                                           | 0.0000 | 0.0004 |
| Yip1 domain family, member 6                                                                          | 212341_at   | YIPF6         | NM_173834 | Biological function unknown                                                                                                                                                                                                                                                                                                 | 0.0037 | 0.0434 |
| Amine oxidase (flavin containing) domain 2                                                            | 212348_s_at | AOF2          | AB011173  | Electron transport, transcription, regulation of transcription, DNA-dependent, chromatin modification                                                                                                                                                                                                                       |        |        |
|                                                                                                       |             |               |           |                                                                                                                                                                                                                                                                                                                             | 0.0000 | 0.0000 |
| Structural maintenance of chromosomes flexible hinge domain containing 1                              | 212577_at   | SMCHD1        | XM_113962 | Chromosome organization and biogenesis                                                                                                                                                                                                                                                                                      | 0.0060 | 0.0000 |
| EH domain binding protein 1                                                                           | 212650_at   | EHBP1         | NM_015252 | Biological function unknown                                                                                                                                                                                                                                                                                                 | 0.0400 | 0.0000 |
| Hypothetical protein TI-227H taurine upregulated gene 1                                               | 212725_s_at | TI-227H, TUG1 | NR_002323 | Biological function unknown                                                                                                                                                                                                                                                                                                 | 0.0001 | 0.0001 |
| Chromosome 1 open reading 216                                                                         | 212791_at   | C1ORF216      | NM_152374 | Biological function unknown                                                                                                                                                                                                                                                                                                 | 0.0000 | 0.0004 |



|                                                                                  |             |               |              |                                                                                                                                                                                                            |        |        |
|----------------------------------------------------------------------------------|-------------|---------------|--------------|------------------------------------------------------------------------------------------------------------------------------------------------------------------------------------------------------------|--------|--------|
| KIAA1033                                                                         | 212794_s_at | KIAA1033      | AK001728     | Biological function unknown                                                                                                                                                                                | 0.0160 | 0.0073 |
| TAF4 RNA polymerase II, TATA box binding protein (TBP)-associated factor, 135kDa | 213090_s_at | TAF4          | NM_003185    | Transcription, transcription initiation, regulation of transcription, DNA-dependent                                                                                                                        | 0.0030 | 0.0000 |
| Bicaudal D homolog 2 (Drosophila)                                                | 213154_s_at | BICD2         | NM_001003800 | Vesicle mediated transport                                                                                                                                                                                 | 0.0408 | 0.0066 |
| Keratin 10 (epidermolytic hyperkeratosis; keratosis palmaris et plantaris)       | 213287_s_at | KRT10         | X14487       | Epidermis development                                                                                                                                                                                      | 0.0073 | 0.0000 |
| NIMA (never in mitosis gene a)-related kinase 1                                  | 213331_s_at | NEK1          | NM_012224    | Protein amino acid phosphorylation, cell cycle mitosis and division                                                                                                                                        | 0.0045 | 0.0027 |
| Stonin 1                                                                         | 213413_at   | STON1         | NM_006873    | Regulation of endocytosis, intracellular protein, transport, endocytosis                                                                                                                                   | 0.0122 | 0.0070 |
| Regeneration associated muscle protease                                          | 213642_at   |               | BE312027     | Translation                                                                                                                                                                                                | 0.0028 | 0.0461 |
| Integrin, beta 5                                                                 | 213661_at   | DKFZP586H2123 | NM_001001991 | Proteolysis                                                                                                                                                                                                | 0.0162 | 0.0008 |
|                                                                                  | 214020_x_at | ITGB5         | NM_002213    | Cell adhesion, cell-matrix adhesion, integrin-mediated signaling pathway, development                                                                                                                      | 0.0286 | 0.0000 |
| Aldehyde dehydrogenase 1 family, member A3                                       | 214073_at   | ALDH1A3       | NM_005231    | Alcohol, lipid and retinoic metabolism, metabolism, positive regulation of apoptosis, embryonic eye morphogenesis                                                                                          | 0.0202 | 0.0116 |
| Chromosome 1 open reading frame 107                                              | 214193_s_at | C1orf107      | NM_014388    | Development                                                                                                                                                                                                | 0.0002 | 0.0003 |
| Immunity-related GTPase family, cinema                                           | 214392_at   | IRGC          | NM_019612    | Cell communication, signal transduction                                                                                                                                                                    | 0.0001 | 0.0066 |
| Protein inhibitor of activated STAT, 2                                           | 214593_at   | PIAS2         | NM_004671    | Transcription, ubiquitin cycle androgen receptor signaling pathway, positive regulation of transcription, DNA-dependent                                                                                    | 0.0267 | 0.0080 |
| Reticulon 4                                                                      | 214629_x_at | RTN4          | AF320999     | Negative regulation of anti-apoptosis, negative regulation of axon extension, regulation of apoptosis, apoptosis                                                                                           | 0.0007 | 0.0368 |
| Syntrophin, beta 1 (dystrophin-associated protein A1, 59kDa, basic component 1)  | 214708_at   | SNTB1         | NM_021021    | Muscle contraction                                                                                                                                                                                         | 0.0000 | 0.0000 |
| Zinc finger protein 451                                                          | 215012_at   | ZNF451        | NM_001031623 | Transcription, regulation of transcription, DNA-dependent, phosphoenolpyruvate-dependent sugar phosphotransferase system                                                                                   | 0.0001 | 0.0013 |
| Paraspeckle component 1                                                          | 215083_at   | PSPC1         | AL049263     | Regulation of nucleobase, nucleoside, nucleotide, and nucleic acid metabolism                                                                                                                              | 0.0089 | 0.0003 |
| Lymphocyte antigen 9                                                             | 215967_s_at | LY9           | NM_001033667 | Cell adhesion, humoral defense mechanism (sensu Vertebrata)                                                                                                                                                | 0.0000 | 0.0215 |
| Dishevelled associated activator of morphogenesis 1                              | 216060_s_at | DAAM1         | NM_014992    | Cell organization and biogenesis, actin cytoskeleton organization and biogenesis                                                                                                                           | 0.0000 | 0.0000 |
| Leupaxin                                                                         | 216250_s_at | LPXN          | NM_004881    | Protein complex assembly, cell adhesion, signal transduction                                                                                                                                               | 0.0000 | 0.0000 |
| Erythropoietin receptor                                                          | 216999_at   | EPOR          | X97671       | Signal transduction, small GTPase mediated signal transduction                                                                                                                                             | 0.0003 | 0.0001 |
| Similar to alpha-2-glycoprotein 1, zinc                                          | 217013_at   | LOC646282     | AC004522     | Biological function unknown                                                                                                                                                                                | 0.0272 | 0.0181 |
| Similar to putative transcription factor ZNF131                                  | 217306_at   | LOC645749     | AL031119     | Biological function unknown                                                                                                                                                                                | 0.0000 | 0.0000 |
| Transmembrane BAX inhibitor motif containing 1                                   | 217730_at   | TMBIM1        | NM_022152    | Biological function unknown                                                                                                                                                                                | 0.0022 | 0.0000 |
| YKT6 v-SNARE homolog (S. cerevisiae)                                             | 217784_at   | YKT6          | NM_006555    | ER to Golgi vesicle-mediated transport, vesicle targeting, vesicle docking during exocytosis, transport                                                                                                    | 0.0052 | 0.0000 |
| ATP synthase, H+ transporting, mitochondrial F1 complex, epsilon subunit         | 217801_at   | ATP5E         | NM_006886    | Ion and proton transport, ATP synthesis coupled proton transport                                                                                                                                           | 0.0002 | 0.0498 |
| Glioma tumor suppressor candidate region gene 2                                  | 217807_s_at | GLTSCR2       | NM_015710    |                                                                                                                                                                                                            | 0.0162 | 0.0068 |
| Suppressor of Ty 16 homolog (S. cerevisiae)                                      | 217815_at   | SUPT16H       | NM_007192    | DNA replication and repair, nucleosome disassembly, transcription, regulation of transcription, DNA-dependent, transcription from RNA polymerase II, promoter proteolysis, response to DNA damage stimulus | 0.0166 | 0.0000 |

|                                                                                                      |             |                         |                    |                                                                                                                                                                                                                                                                                                                                                                                                                                                                                        |        |        |
|------------------------------------------------------------------------------------------------------|-------------|-------------------------|--------------------|----------------------------------------------------------------------------------------------------------------------------------------------------------------------------------------------------------------------------------------------------------------------------------------------------------------------------------------------------------------------------------------------------------------------------------------------------------------------------------------|--------|--------|
| Golgi autoantigen, golgin subfamily a, 7                                                             | 217819_at   | GOLGA7                  | NM_016099          | Lactation, lipid and triacylglycerol biosynthesis, activation of NF-kappaB transcription factor, B cell homeostasis, protein modification, protein amino acid phosphorylation, I-kappaB phosphorylation, DNA replication and repair, base-excision repair, gap filling, anti-apoptosis, response to DNA damage stimulus, cell death, transport, intracellular protein transport, ion transport, synaptic transmission metabolism, synaptic transmission, cholinergic adenine transport |        |        |
|                                                                                                      |             |                         |                    |                                                                                                                                                                                                                                                                                                                                                                                                                                                                                        | 0.0339 | 0.0063 |
| Leucine aminopeptidase 3                                                                             | 217933_s_at | LAP3                    | NM_015907          | Proteolysis, protein metabolism                                                                                                                                                                                                                                                                                                                                                                                                                                                        | 0.0000 | 0.0296 |
| Mitogen-activated protein kinase kinase 1 interacting protein 1                                      | 217971_at   | MAP2K1ip1               | NM_021970          | Cell communication, signal transduction                                                                                                                                                                                                                                                                                                                                                                                                                                                | 0.0000 | 0.0003 |
| RNA-binding protein                                                                                  | 218035_s_at | FLJ20273                | NM_019027          | Nucleotide, nucleic acid and RNA binding                                                                                                                                                                                                                                                                                                                                                                                                                                               | 0.0122 | 0.0008 |
| CDC42 effector protein (Rho GTPase binding) 4                                                        | 218063_s_at | CDC42EP4                | AF099664           | Regulation of cell shape, positive regulation of pseudopodium formation                                                                                                                                                                                                                                                                                                                                                                                                                | 0.0000 | 0.0000 |
| Cytoskeleton associated protein 2                                                                    | 218252_at   | CKAP2                   | NM_018204          | Apoptosis, cell cycle                                                                                                                                                                                                                                                                                                                                                                                                                                                                  | 0.0000 | 0.0002 |
| RAB guanine nucleotide exchange factor (GEF) 1                                                       | 218310_at   | RABGEF1                 | NM_014504          | Endocytosis, protein transport, transport                                                                                                                                                                                                                                                                                                                                                                                                                                              | 0.0000 | 0.0161 |
| Fanconi anemia, complementation group L                                                              | 218397_at   | FANCL                   | NM_018062          | DNA repair, ubiquitin cycle, response to DNA damage stimulus                                                                                                                                                                                                                                                                                                                                                                                                                           | 0.0000 | 0.0000 |
| Sorting nexin 10                                                                                     | 218404_at   | SNX10                   | NM_013322          | Intracellular signaling cascade, protein transport, transport                                                                                                                                                                                                                                                                                                                                                                                                                          | 0.0041 | 0.0495 |
| Chromosome 1 open reading frame 115                                                                  | 218546_at   | C1orf115                | NM_024709          | Biological function unknown                                                                                                                                                                                                                                                                                                                                                                                                                                                            | 0.0009 | 0.0000 |
| Immediate early response 5                                                                           | 218611_at   | IER5                    | NM_016545          | Regulation of nucleobase, nucleoside, nucleotide and nucleic acid metabolism                                                                                                                                                                                                                                                                                                                                                                                                           | 0.0000 | 0.0000 |
| Hypothetical protein MGC2752                                                                         | 218624_s_at | MGC2752                 | NM_023939          | Biological function unknown                                                                                                                                                                                                                                                                                                                                                                                                                                                            | 0.0000 | 0.0000 |
| Vacuolar protein sorting 28 homolog (S. cerevisiae)                                                  | 218679_s_at | VPS28                   | NM_016208          | Protein transport, transport                                                                                                                                                                                                                                                                                                                                                                                                                                                           | 0.0000 | 0.0381 |
| Hypothetical protein FLJ20920                                                                        | 218844_at   | FLJ20920                | NM_025149          | Metabolism                                                                                                                                                                                                                                                                                                                                                                                                                                                                             | 0.0000 | 0.0001 |
| NFU1 iron-sulfur cluster scaffold homolog (S. cerevisiae)                                            | 218946_at   | NFU1                    | NM_015700          | Iron-sulfur cluster assembly                                                                                                                                                                                                                                                                                                                                                                                                                                                           | 0.0152 | 0.0000 |
| Mediator of cell motility 1                                                                          | 219065_s_at | MEMO1                   | NM_015955          | Biological function unknown                                                                                                                                                                                                                                                                                                                                                                                                                                                            | 0.0197 | 0.0002 |
| Development and differentiation enhancing factor-like 1                                              | 219103_at   | DDEFL1                  | NM_017707          | Regulation of GTPase activity                                                                                                                                                                                                                                                                                                                                                                                                                                                          | 0.0032 | 0.0035 |
| tRNA-histidine guanylyl transferase 1-like (S. cerevisiae)                                           | 219122_s_at | THG1L                   | NM_017872          | tRNA modification and processing                                                                                                                                                                                                                                                                                                                                                                                                                                                       | 0.0009 | 0.0031 |
| Chromosome 2 open reading frame 47                                                                   | 219176_at   | C2ORF47                 | NM_024520          | Biological function unknown                                                                                                                                                                                                                                                                                                                                                                                                                                                            | 0.0000 | 0.0074 |
| RNA binding motif protein 15                                                                         | 219286_s_at | RBM15                   | NM_022768          | Regulation of transcription                                                                                                                                                                                                                                                                                                                                                                                                                                                            | 0.0003 | 0.0000 |
| Alpha 1,4-galactosyltransferase (globotriaosylceramide synthase)                                     | 219488_at   | A4GALT                  | NM_017436          | Glycosphingolipid biosynthesis, plasma membrane organization and biogenesis, lipid biosynthesis                                                                                                                                                                                                                                                                                                                                                                                        | 0.0002 | 0.0229 |
| Erythroid associated factor                                                                          | 219672_at   | ERAF                    | NM_016633          | Protein folding, hemoglobin metabolism, hemopoiesis                                                                                                                                                                                                                                                                                                                                                                                                                                    | 0.0000 | 0.0000 |
| Tetratricopeptide repeat domain 23                                                                   | 219838_at   | TTC23                   | NM_022905          | Biological function unknown                                                                                                                                                                                                                                                                                                                                                                                                                                                            | 0.0047 | 0.0001 |
| Hypothetical protein FLJ13197                                                                        | 219871_at   | FLJ13197                | NM_024614          | Biological function unknown                                                                                                                                                                                                                                                                                                                                                                                                                                                            | 0.0000 | 0.0000 |
| Calcium binding tyrosine-(Y)-phosphorylation regulated (fibrousheathin 2)                            | 219928_s_at | CABYR                   | NM_012189          | Signal transduction                                                                                                                                                                                                                                                                                                                                                                                                                                                                    | 0.0116 | 0.0004 |
| Family with sequence similarity 60, member A                                                         | 220147_s_at | FAM60A                  | NM_021238          | Biological function unknown                                                                                                                                                                                                                                                                                                                                                                                                                                                            | 0.0000 | 0.0000 |
| Chromosome 10 open reading frame 95                                                                  | 220152_at   | C10orf95                | NM_024886          | Biological function unknown                                                                                                                                                                                                                                                                                                                                                                                                                                                            | 0.0002 | 0.0333 |
| Ral GEF with PH domain and SH3 binidng motif 2                                                       | 220338_at   | RALGPS2                 | NM_018037          | Small GTPase mediated signal transduction                                                                                                                                                                                                                                                                                                                                                                                                                                              | 0.0000 | 0.0404 |
| SEMK homolog 1, supressor of mek1 (Dictyostelium)                                                    | 220368_s_at | SMEK1                   | NM_017936          | Biological function unknown                                                                                                                                                                                                                                                                                                                                                                                                                                                            | 0.0000 | 0.0001 |
|                                                                                                      | 220687_at   |                         | NM_018175          | Biological function unknown                                                                                                                                                                                                                                                                                                                                                                                                                                                            | 0.0000 | 0.0030 |
| Membrane-spanning 4-domains, subfamily A, member 12                                                  | 220834_at   | MS4A12                  | NM_017716          | Electron transport, signal transduction                                                                                                                                                                                                                                                                                                                                                                                                                                                | 0.0000 | 0.0000 |
| ATPase, Class V, type 10B                                                                            | 220920_at   | ATP10B                  | NM_025153          | Cation transport                                                                                                                                                                                                                                                                                                                                                                                                                                                                       | 0.0000 | 0.0000 |
| Chromosome 21 open reading frame 91                                                                  | 220941_s_at | C21orf91                | NM_017447          | Biological function unknown                                                                                                                                                                                                                                                                                                                                                                                                                                                            | 0.0000 | 0.0000 |
| Kelch domain containing 4                                                                            | 221219_s_at | KLHDC4                  | NM_017566          | Cell growth and/or maintenance                                                                                                                                                                                                                                                                                                                                                                                                                                                         | 0.0001 | 0.0046 |
| Atonal homolog 1 (Drosophila)                                                                        | 221336_at   | ATOH1                   | NM_005172          | Regulation of transcription, DNA-dependent, transcription from RNA polymerase II promoter, central nervous system development, regulation of transcription, transcription                                                                                                                                                                                                                                                                                                              | 0.0185 | 0.0159 |
| Iron-sulfa cluster assembly 1 homolog (S. cerevesiae)                                                | 221425_s_at | ISCA1                   | NM_030940          | Biological function unknown                                                                                                                                                                                                                                                                                                                                                                                                                                                            | 0.0008 | 0.0000 |
| CDC14 cell division cycle 14 homolg B (S. cerevisiae)                                                | 221556_at   | CDC14B                  | NM_001077181       | Protein amino acid dephosphorylation                                                                                                                                                                                                                                                                                                                                                                                                                                                   | 0.0354 | 0.0004 |
| Immunoglobulin kappa constant, immunoglobulin kappa variable 1-5, immunogolbulin kappa variable 2-24 | 221651_x_at | IGKC, IGKV1-5, IGKV2 24 | 3514, 28299, 28923 | Immune response, antigen presentation, endogenous antigen via MHC class I                                                                                                                                                                                                                                                                                                                                                                                                              | 0.0125 | 0.0068 |

|                                                                                                      |                     |                         |                    |                                                                                                                                                                                                                                                                                                                 |        |        |
|------------------------------------------------------------------------------------------------------|---------------------|-------------------------|--------------------|-----------------------------------------------------------------------------------------------------------------------------------------------------------------------------------------------------------------------------------------------------------------------------------------------------------------|--------|--------|
| Immunoglobulin kappa constant, immunoglobulin kappa variable 1-5, immunoglobulin kappa variable 2-24 | 221671_x_at         | IGKC, IGKV1-5, IGKV2 24 | 3514, 28299, 28923 | Immune response, antigen presentation, endogenous antigen via MHC class I                                                                                                                                                                                                                                       | 0.0090 | 0.0000 |
| Cylindromatosis (turban tumor syndrome)                                                              | 221903_s_at         | CYLD                    | NM_001042355       | Protein biosynthesis, ubiquitin-dependent protein catabolism, cell cycle negative regulation of progression through cell cycle, ubiquitin-dependent protein catabolism, ubiquitin cycle                                                                                                                         | 0.0358 | 0.0000 |
| Family with sequence similarity 131, member A                                                        | 221904_at           | FAM131A                 | NM_144635          | Biological function unknown                                                                                                                                                                                                                                                                                     | 0.0381 | 0.0000 |
| Matrix metalloproteinase 24 (membrane-inserted)                                                      | 49679_s_at          | MMP24                   | NM_006690          | Peptidoglycan metabolism, proteolysis                                                                                                                                                                                                                                                                           | 0.0000 | 0.0000 |
| Potassium channel tetramerisation domain containing 14                                               | 58916_at            | KCTD14                  | NM_023930          | Potassium ion transport                                                                                                                                                                                                                                                                                         | 0.0000 | 0.0003 |
| Similar to Zinc finger protein 418, zinc finger protein 814                                          | 60794_f_at          | LOC730051, ZNF814       | XR_015766          | Regulation of transcription, DNA-dependent                                                                                                                                                                                                                                                                      | 0.0124 | 0.0058 |
| Leucine-rich repeats and calponin homology (CH) domain containing 4                                  | 90610_at            | LRCH4                   | NM_002319          | Nervous system development                                                                                                                                                                                                                                                                                      | 0.0026 | 0.0100 |
|                                                                                                      | AFFX-r2-Bs-dap-5_at |                         |                    | Transcript, regulation of transcription, DNA-dependent, protein modification, amino acid biosynthesis, lysine biosynthesis, lysine biosynthesis via diaminopimelate, diaminopimelate biosynthesis, tRNA 3'-terminal CCA addition, RNA and tRNA processing, RNA repair, methylglyoxal biosynthesis, biosynthesis |        |        |
|                                                                                                      |                     |                         |                    |                                                                                                                                                                                                                                                                                                                 | 0.0325 | 0.0043 |

<sup>A</sup>Adjusted p values for antepartum vs. postpartum samples

<sup>B</sup>Adjusted p values for umbilical vs. postpartum samples





|                                                                                  |             |      |        |      |        |      |        |       |        |       |        |       |        |      |       |      |        |       |       |      |    |  |
|----------------------------------------------------------------------------------|-------------|------|--------|------|--------|------|--------|-------|--------|-------|--------|-------|--------|------|-------|------|--------|-------|-------|------|----|--|
| Olfactory receptor, family 7, subfamily e, member 37 pseudogene                  | 217499_x_at | 68.0 | ++     | 43.8 | ++     | 64.1 | ++     | 84.5  | ++     | 66.8  | ++     | 122.8 | +++    | 91.6 | ++    | 63.8 | ++     | 101.9 | +++   | 66.4 | ++ |  |
| Cation channel, sperm associated 2 cation channel, sperm associated 2 pseudogene | 217588_at   | 23.2 | ++     | 22.5 | ++     | 15.4 | ++     | 20.2  | ++     | 18.9  | ++     | 34.0  | ++     | 4.0  | +     | 26.2 | ++     | 15.4  | ++    | 29.8 | ++ |  |
| Desmoglein 2                                                                     | 217901_at   | 0.4  | <0.1   | 6.3  | +      | 5.1  | +      | 26.8  | ++     | 6.2   | +      | 8.6   | +      | 1.9  | +     | 6.3  | +      | 14.3  | ++    | 18.1 | ++ |  |
| Mitochondrial ribosomal protein L4                                               | 218105_s_at | 17.6 | ++     | 6.3  | +      | 3.4  | +      | 26.4  | ++     | 5.0   | +      | 17.4  | ++     | 2.9  | +     | 1.8  | +      | 3.6   | +     | 25.4 | ++ |  |
| Fanconi anemia, complementation group L                                          | 218397_at   | 14.0 | ++     | 9.6  | +      | 11.5 | ++     | 7.5   | +      | 16.8  | ++     | 3.7   | +      | 8.5  | ++    | 10.7 | ++     | 8.0   | +     | 12.8 | ++ |  |
| TBC1 domain family, member 13                                                    | 218596_at   | 6.5  |        | 4.4  | +      | 7.3  | +      | 2.0   | +      | 5.9   | +      | 6.7   | +      | 2.5  | +     | 11.1 | ++     | 2.8   | +     | 9.5  | +  |  |
| Phospholipid scramblase 3                                                        | 218828_at   | 24.0 | ++     | 16.5 | ++     | 8.6  | +      | 70.5  | ++     | 123.5 | +++    | 75.6  | ++     | 98.7 | ++    | 78.5 | ++     | 67.2  | ++    | 64.8 | ++ |  |
| Chromosome 2 open reading frame 43                                               | 219008_at   | 4.1  |        | 5.9  | +      | 12.0 | ++     | 18.1  | ++     | 8.5   | +      | 21.0  | ++     | 19.7 | ++    | 16.2 | ++     | 17.2  | ++    | 17.7 | ++ |  |
| Brevican                                                                         | 219107_at   | 32.2 | ++     | 29.2 | ++     | 24.2 | ++     | 8.6   | +      | 5.5   | +      | 23.2  | ++     | 18.1 | ++    | 37.0 | ++     | 9.5   | +     | 49.9 | ++ |  |
| SLAM family member 8                                                             | 219386_s_at | 10.2 | ++     | 4.3  | +      | 2.4  | +      | 6.6   | +      | 6.6   | +      | 1.9   | +      | 2.1  | +     | 10.5 | ++     | 13.3  | ++    | 3.9  | +  |  |
| Placenta-specific 1                                                              | 219702_at   | 22.0 | ++     | 13.4 | ++     | 19.1 | ++     | 2.8   | +      | 13.0  | ++     | 13.5  | ++     | 2.5  | +     | 1.3  | +      | 17.0  | ++    | 6.6  | +  |  |
| Galactose-3-O-sulfotransferase 4                                                 | 219815_at   | 26.6 | ++     | 26.1 | ++     | 41.5 | ++     | 60.1  | ++     | 14.9  | ++     | 23.2  | ++     | 23.5 | ++    | 36.3 | ++     | 33.9  | ++    | 43.2 | ++ |  |
| Glycerophosphodiester phosphodiesterase domain containing 2                      | 220291_at   | 25.6 | ++     | 5.0  | +      | 4.3  | +      | 27.1  | ++     | 3.0   | +      | 5.5   | +      | 6.0  | +     | 58.0 | ++     | 6.6   | +     | 25.2 | ++ |  |
| Signal-regulatory protein gamma                                                  | 220485_s_at | 45.1 | ++     | 32.5 | ++     | 47.9 | ++     | 46.8  | ++     | 69.5  | ++     | 67.4  | ++     | 78.0 | ++    | 29.6 | ++     | 30.9  | ++    | 28.4 | ++ |  |
| Testis-specific kinase substrate                                                 | 220545_s_at | 18.8 | ++     | 9.1  | +      | 2.0  | +      | 8.5   | +      | 4.4   | +      | 13.0  | ++     | 4.1  | +     | 9.4  | +      | 13.8  | ++    | 10.9 | ++ |  |
| Hypothetical protein FLJ11783                                                    | 220546_at   | 5.6  | +      | 4.3  | +      | 8.7  | +      | 6.7   | +      | 17.8  | ++     | 13.0  | ++     | 3.0  | +     | 7.9  | +      | 13.0  | ++    | 6.5  | +  |  |
| Disabled homolog 1 (Drosophila)                                                  | 220611_at   | 11.9 | ++     | 15.3 | ++     | 1.3  | +      | 37.1  | ++     | 2.8   | +      | 10.7  | ++     | 0.9  | <1    | 16.3 | ++     | 7.4   | +     | 18.2 | ++ |  |
| Roundabout homolog 4, magic roundabout (Drosophila)                              | 220687_at   | 12.2 | ++     | 13.2 | ++     | 4.5  | +      | 29.6  | ++     | 4.7   | +      | 1.1   | +      | 7.0  | +     | 3.6  | +      | 10.9  | ++    | 15.5 | ++ |  |
| Roundabout homolog 4, magic roundabout (Drosophila)                              | 220758_s_at | 26.4 | ++     | 28.3 | ++     | 21.5 | ++     | 45.5  | ++     | 64.1  | ++     | 36.7  | ++     | 28.0 | ++    | 48.6 | ++     | 65.6  | ++    | 56.2 | ++ |  |
| hCG 1732469                                                                      | 220823_at   | 17.3 | ++     | 10.7 | ++     | 17.2 | ++     | 2.4   | +      | 24.4  | ++     | 18.9  | ++     | 15.2 | ++    | 20.5 | ++     | 21.9  | ++    | 20.3 | ++ |  |
| WD repeats and SOF 1 domain containing                                           | 220843_s_at | 1.0  | +      | 12.0 | ++     | 11.1 | ++     | 7.6   | +      | 11.4  | ++     | 14.4  | ++     | 3.8  | +     | 11.1 | ++     | 4.0   | +     | 10.5 | ++ |  |
| Unc-51-like kinase 4 (C elegans)                                                 | 220958_at   | 9.0  | +      | 2.6  | +      | 0.9  | <1     | 3.2   | +      | 2.3   | +      | 10.4  | ++     | 7.4  | +     | 14.1 | ++     | 14.6  | ++    | 7.2  | +  |  |
| Integral membrane protein 2C                                                     | 221004_s_at | 72.5 | ++     | 39.6 | ++     | 60.8 | ++     | 27.5  | ++     | 20.2  | ++     | 15.1  | ++     | 32.9 | ++    | 9.9  | +      | 26.9  | ++    | 16.2 | ++ |  |
| Natural cytotoxicity triggering receptor 2                                       | 221074_at   | 10.3 | ++     | 2.9  | +      | 5.0  | +      | 1.9   | +      | 9.7   | +      | 3.3   | +      | 1.6  | +     | 9.9  | +      | 9.5   | +     | 8.8  | +  |  |
| 2-oxoglutarate and iron-dependent oxygenase domain containing 1                  | 221090_s_at | 14.0 | ++     | 13.5 | ++     | 10.0 | ++     | 16.7  | ++     | 14.8  | ++     | 25.0  | ++     | 24.3 | ++    | 7.9  | +      | 17.3  | ++    | 20.3 | ++ |  |
| Growth differentiation factor 9                                                  | 221314_at   | 3.6  | +      | 14.6 | ++     | 8.6  | +      | 23.0  | ++     | 21.9  | ++     | 6.3   | +      | 12.7 | ++    | 29.2 | ++     | 26.1  | ++    | 41.3 | ++ |  |
| Cholinergic receptor, muscarinic 5                                               | 221347_at   | 2.7  | +      | 17.6 | ++     | 2.6  | +      | 12.7  | ++     | 12.2  | ++     | 38.1  | ++     | 15.3 | ++    | 18.0 | ++     | 28.2  | ++    | 32.4 | ++ |  |
| Hypothetical protein LOC339047                                                   | 221501_x_at | 80.0 | ++     | 68.0 | ++     | 74.9 | ++     | 170.8 | +++    | 91.6  | ++     | 126.1 | +++    | 58.5 | ++    | 75.1 | ++     | 201.7 | +++   | 37.6 | ++ |  |
| Par-3 partitioning defective 3 homolog (C elegans)                               | 221526_x_at | 8.6  | +      | 17.8 | ++     | 7.9  | +      | 23.0  | ++     | 45.3  | ++     | 5.1   | +      | 6.7  | +     | 11.6 | ++     | 16.7  | ++    | 20.7 | ++ |  |
| MAP/microtubule affinity-regulating kinase 4                                     | 221560_at   | 4.0  | +      | 8.7  | +      | 2.7  | +      | 12.8  | ++     | 5.2   | +      | 40.1  | ++     | 15.2 | ++    | 44.0 | ++     | 26.2  | ++    | 32.2 | ++ |  |
| RRN3 RNA polymerase 1 transcription factor homolog (S. cerevisiae) pseudogene    | 221714_s_at | 2.6  | +      | 2.1  | +      | 11.4 | ++     | 12.9  | ++     | 2.6   | +      | 20.6  | ++     | 9.9  | +     | 21.3 | ++     | 21.1  | ++    | 10.8 | ++ |  |
| Zinc finger protein 512B                                                         | 221869_at   | 9.4  | +      | 4.7  | +      | 1.1  | +      | 3.1   | +      | 2.9   | +      | 10.9  | ++     | 1.2  | +     | 3.4  | +      | 3.8   | +     | 2.0  | +  |  |
| aarF domain containing kinase 2                                                  | 222117_s_at | 15.6 | ++     | 17.9 | ++     | 4.8  | +      | 20.6  | ++     | 11.8  | ++     | 2.4   | +      | 7.8  | +     | 13.7 | ++     | 2.4   | +     | 17.7 | ++ |  |
| Similar to Zinc finger protein 418                                               | 222135_at   | 9.8  | +      | 0.9  | <1     | 8.5  | +      | 1.6   | +      | 3.2   | +      | 12.4  | ++     | 5.9  | +     | 1.6  | +      | 15.7  | ++    | 14.7 | ++ |  |
| Splicing factor 3a, subunit 2, 66kDa                                             | 37462_i_at  | 63.3 | ++     | 4.3  | +      | 34.1 | ++     | 4.8   | +      | 1.6   | +      | 26.8  | ++     | 43.9 | ++    | 25.4 | ++     | 36.8  | ++    | 15.0 | ++ |  |
| Hydroxysteroid (17-beta) dehydrogenase 6 homolog (mouse)                         | 37512_at    | 7.8  | +      | 4.7  | +      | 7.4  | +      | 19.2  | ++     | 1.7   | +      | 0.3   | <1     | 0.2  | <1    | 0.8  | <1     | 5.8   | +     | 3.4  | +  |  |
| CD22 molecule, myelin-associated glycoprotein                                    | 38521_at    | 45.7 | ++     | 38.5 | ++     | 38.6 | ++     | 20.1  | ++     | 9.2   | +      | 55.0  | ++     | 22.2 | ++    | 29.2 | ++     | 49.9  | ++    | 11.4 | ++ |  |
| Acetyl-Coenzyme A carboxylase beta                                               | 49452_at    | 6.5  | +      | 3.6  | +      | 3.0  | +      | 2.0   | +      | 3.1   | +      | 3.6   | +      | 3.1  | +     | 13.3 | ++     | 7.7   | +     | 7.8  | +  |  |
| AFFX-BioDn-3_at                                                                  | 2999.7      | ++++ | 1074.0 | ++++ | 1182.4 | ++++ | 3810.2 | ++++  | 1570.2 | ++++  | 4362.5 | ++++  | 1854.7 | ++++ | 224.2 | +++  | 3063.2 | ++++  | 695.7 | +++  |    |  |
